# Supplementary material for: Myeloid Tribbles 1 induces early atherosclerosis via enhanced foam cell expansion
Source: PubMed Central journal article supplement (PMC6821468; doi:10.1126/sciadv.aax9183), 2019-10-30
Supplement: aax9183_SM.pdf [file aax9183_SM.pdf]

## Supplementary Materials for

### Myeloid Tribbles 1 induces early atherosclerosis via enhanced foam cell expansion

Jessica M. Johnston, Adrienn Angyal, Robert C. Bauer, Stephen Hamby, S. Kim Suvarna, Kajus Baidžajevs, Zoltan Hegedus, T. Neil Dear, Martin Turner, The Cardiogenics Consortium, Heather L. Wilson, Alison H. Goodall, Daniel J. Rader, Carol C. Shoulders\*, Sheila E. Francis, Endre Kiss-Toth\*

\*Corresponding author. Email: c.shoulders@qmul.ac.uk (C.C.S.); e.kiss-toth@sheffield.ac.uk (E.K.-T.)

Published 30 October 2019, *Sci. Adv.* **5**, eaax9183 (2019)

DOI: 10.1126/sciadv.aax9183

#### This PDF file includes:

Fig. S1. Expected and observed numbers of 8-week-old offspring with specified *Trib1* genotypes.

Fig. S2. *Trib1*<sup>mKO</sup> and *Trib1*<sup>mTg</sup> mice have normal tissue anatomy and F4/80<sup>+</sup> macrophage numbers.

Fig. S3. Plasma lipid levels of chimera and *Pcsk9* mice.

Fig. S4. Atherosclerotic burden in *mTrib1*→*ApoE*<sup>-/-</sup> mice, clinical grading of lesions, and presence of foam cells.

Fig. S5. Reciprocal regulation of OLR1 and SCARB1 RNA levels in polarized MDMs.

Table S1. Fold changes and *P* values of genes differentially expressed in both MDMs and monocytes.

Table S2. Top-ranking biological processes enriched in differentially expressed gene lists of (1) Human *TRIB1*<sup>High</sup> versus *TRIB1*<sup>Low</sup> monocytes and (2) between *TRIB1*<sup>High</sup> versus *TRIB1*<sup>Low</sup> MDMs.

Table S3. The most significantly altered pathways in *TRIB1*<sup>High</sup> versus *TRIB1*<sup>Low</sup> macrophages.

Table S4. Linoleic (LiA), oleic (OA), and lauric acid (LA) in vitro polarized human MDMs recapitulate the *Olr1*<sup>High</sup>/*Lpl*<sup>High</sup>/*Scarb1*<sup>Low</sup>/*CD36*<sup>WT</sup> RNA profile of *Trib1*<sup>mTg</sup> BMDM.

Table S5. Primer sequences.

## Supplementary Materials

### The Cardiogenics Consortium

François Cambien<sup>1</sup>, Panos Deloukas<sup>2</sup>, Jeanette Eardman<sup>3</sup>, Alison H Goodall<sup>4,5</sup>, Christian Hengstenberg<sup>6</sup>, Willem H Ouwehand<sup>2,7</sup>, Nilesh J Samani<sup>4,5</sup>, Heribert Schunkert<sup>3,8</sup>

<sup>1</sup>INSERM UMRS 937, Pierre and Marie Curie University (UPMC, Paris 6) and Medical School, 91 Bd de l'Hôpital 75013, Paris, France

<sup>2</sup>The Wellcome Trust Sanger Institute, Wellcome Trust Genome Campus, Hinxton, Cambridge CB10 1SA, UK

<sup>3</sup>Medizinische Klinik 2, Universität zu Lübeck, Lübeck Germany;

<sup>4</sup>Department of Cardiovascular Sciences, University of Leicester, Glenfield Hospital, Groby Road, Leicester, LE3 9QP, UK

<sup>5</sup>Leicester NIHR Biomedical Research Unit in Cardiovascular Disease, Glenfield Hospital, Leicester, LE3 9QP, UK

<sup>6</sup>Klinik und Poliklinik für Innere Medizin II, Universität Regensburg, Germany;

<sup>7</sup>Department of Haematology, University of Cambridge, Long Road, Cambridge, CB2 2PT, UK and National Health Service Blood and Transplant, Cambridge Centre, Long Road, Cambridge, CB2 2PT, UK

<sup>8</sup>German Center for Cardiovascular Research, Munich Heart Alliance, D-80636 Munich, Germany.

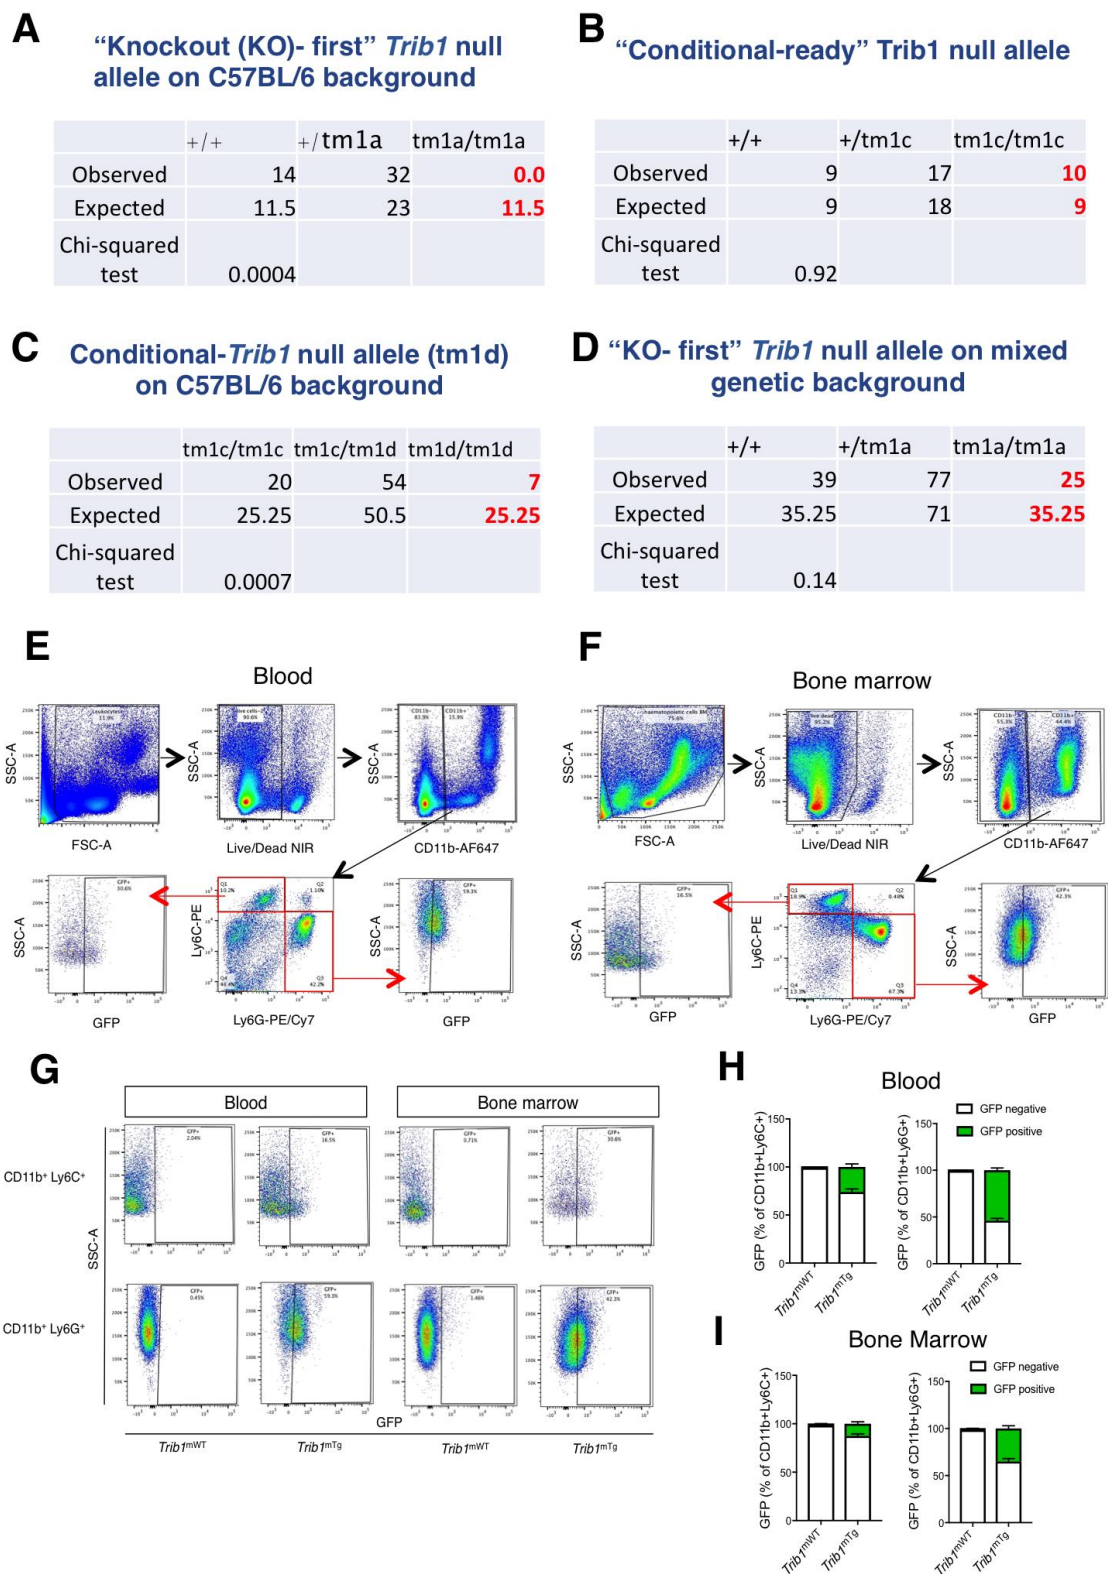

**Fig. S1. Expected and observed numbers of 8-week-old offspring with specified *Trib1* genotypes.** (A) The *Trib1* ‘KO-first’ targeting construct contains elements to produce a

full-body *Trib1* deletion-null allele (*tma1*). No offspring with a *tma1/tma1* genotype were identified from this cross involving two heterozygote parents. **(B)** The expected numbers of mice with each of the three theoretical genotypes (i.e. homozygous WT (+/+), heterozygous (+/*tm1c*) and homozygous (*tm1c/tm1c*) from crossing two heterozygote parents were obtained. **(C)** Homozygous conditional-ready (i.e. floxed) *Trib1* null mice (i.e. *tm1c/tm1c*) were crossed with the heterozygous universal-Cre-recombinase mouse strain B6.Cg-Tg(UBC-cre/ERT2)1Ejb/J. N.B the fewer than expected mice homozygous for *Tm1d*-null *Trib1* allele. **(D)** Genotype distribution of offspring with the (*tma1*) *Trib1* deletion null allele on a mixed genetic (C57BL/6 x 129S9) background. **(E)** Representative gating strategy showing SSC-A and FSC-A plots of specified cell populations from blood and bone marrow **(F)** from 10-14 week old *Trib1*<sup>m<sup>WT</sup> and *Trib1*<sup>m<sup>Tg</sup> mice (n=4). Live/dead cell discrimination was determined by Zombie NIR amine-reactive dye staining. CD11b<sup>+</sup> cells were subdivided based on their expression of Ly6C (Y axis) and Ly6G (X-axis). Arrows indicate the fate of specific cell populations. **(G)** TRIB1-GFP expressing cells in CD11b<sup>+</sup>Ly6C<sup>+</sup>Ly6G<sup>-</sup> (top left quadrants of (f)) and CD11b<sup>+</sup>Ly6C<sup>-</sup>Ly6G<sup>+</sup> (bottom right quadrants of (f)). **(H, I)** Quantification of GFP-positive cells within CD11b<sup>+</sup>Ly6C<sup>+</sup>Ly6G<sup>-</sup> and CD11b<sup>+</sup>Ly6C<sup>-</sup>Ly6G<sup>+</sup> populations of blood and bone marrow cells (n=4, mean ± SEM).</sup></sup>

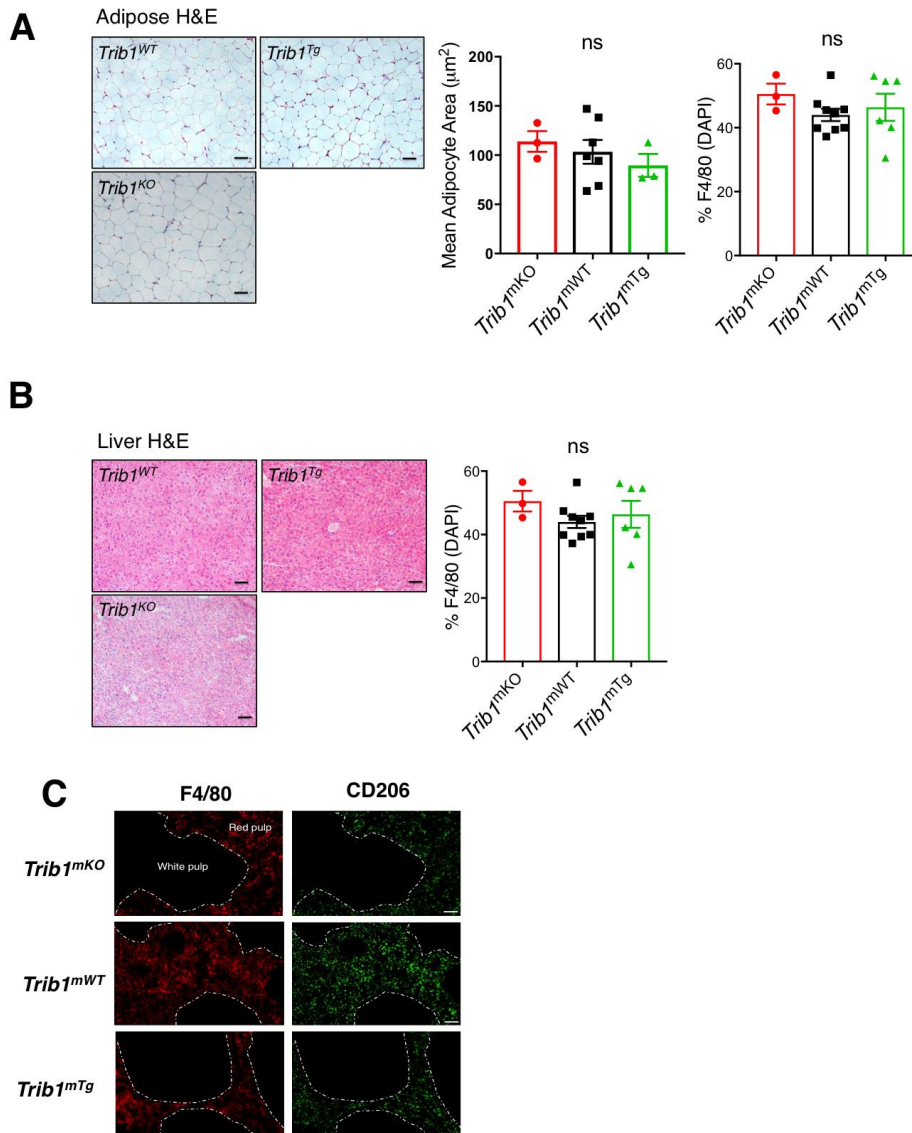

**Fig. S2. *Trib1<sup>mKO</sup>* and *Trib1<sup>mTg</sup>* mice have normal tissue anatomy and F4/80<sup>+</sup> macrophage numbers.** (A) Representative H&E staining of adipose tissue (visceral) cross-sections from 10-week old specified mice fed on chow diet. Middle panel, mean adipocyte area of samples ( $n=3-7$ , mean  $\pm$  SEM); Left panel, F4/80<sup>+</sup> macrophages contents of adipose tissue samples from specified mice ( $n=3-7$ , mean  $\pm$  SEM). (B) Representative H&E staining of liver cross-sections and levels of F4/80<sup>+</sup> macrophages in the liver ( $n=3-9$ , mean  $\pm$  SEM); Scale, 20 $\mu\text{m}$ . (C) Representative IF staining of spleens from *Trib1<sup>mKO</sup>*, *Trib1<sup>mWT</sup>*, and *Trib1<sup>mTg</sup>* mice stained with F4/80 (red, left panels) and CD206 (green, right panels). Dotted lines indicate outlines of red and white splenic pulp. Scale: 50 $\mu\text{m}$ . ns: non-significant.

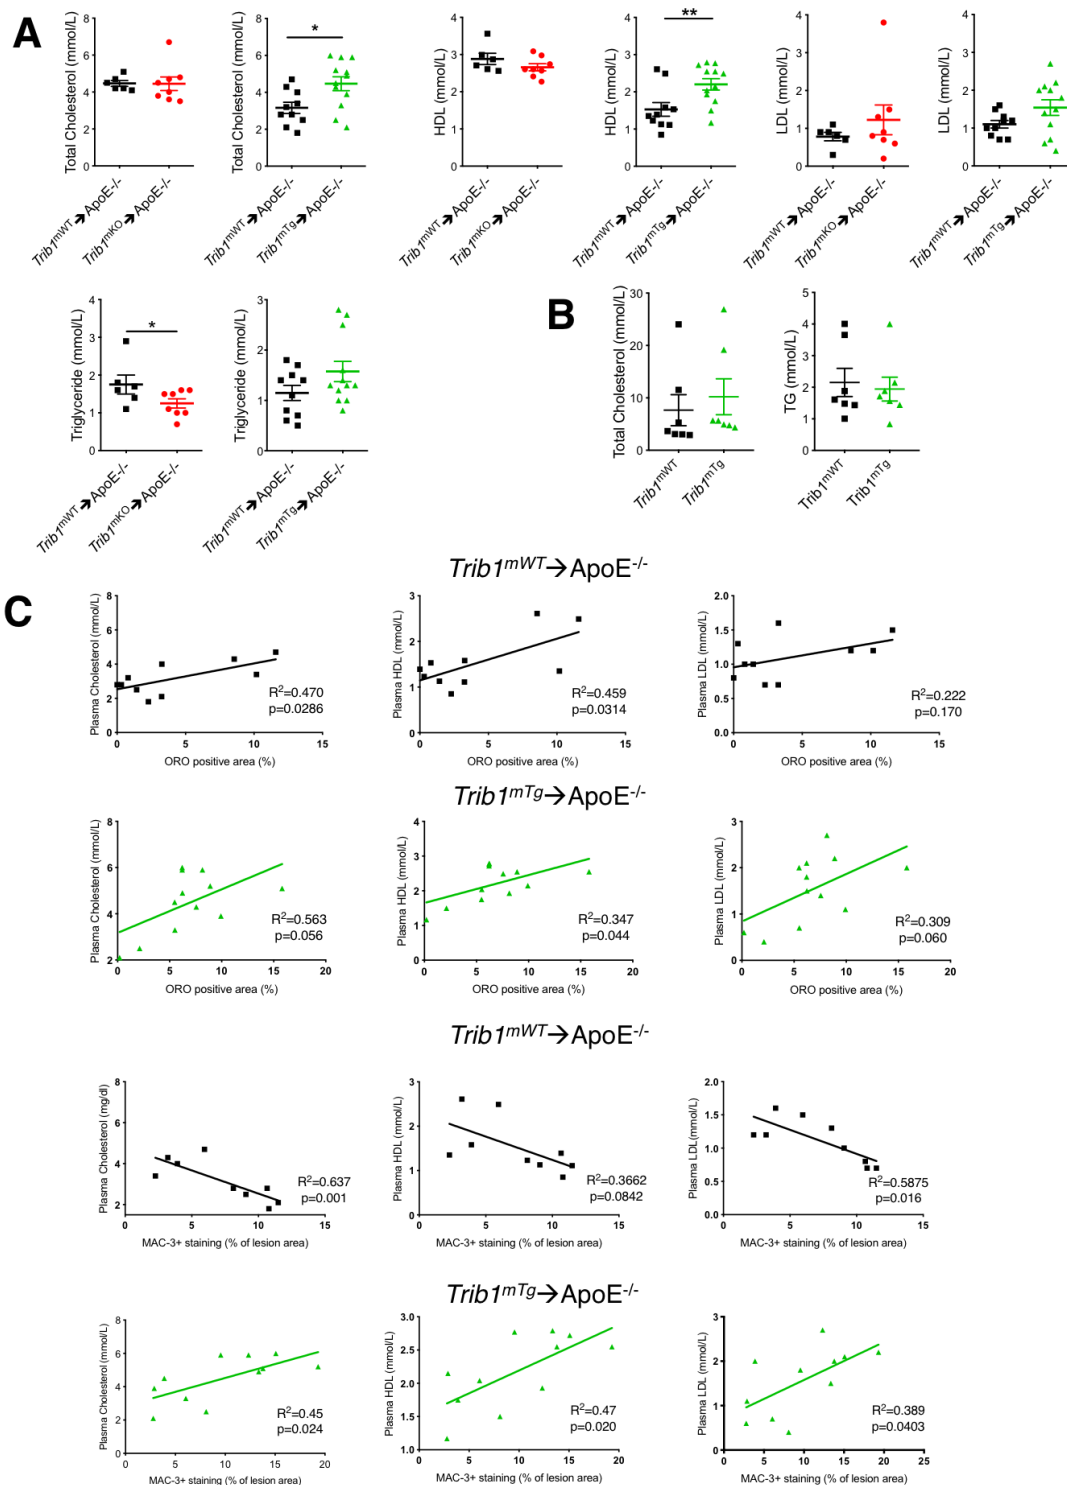

**Fig. S3. Plasma lipid levels of chimera and Pcsk9 mice.** (A) Plasma lipid levels of specified chimera mice following seven weeks recovery and 12 weeks on Western Diet (n=6-12, mean  $\pm$  SEM). (B) Total plasma cholesterol and triglyceride of mTrib1 Pcsk9 mice (n=7, mean  $\pm$  SEM). (C) Correlations in specified mice between total plasma cholesterol (left panel), HDL-C (centre) and LDL-C (right panel) vs. oil Red O (top panels) and MAC-3<sup>+</sup> immuno-reactive areas (bottom two panels), expressed as percentage (%) of total lesion area in aortic sinus. Data shows Pearson correlation co-efficient ( $R^2$ ) along with  $P$  value (n=9-10).

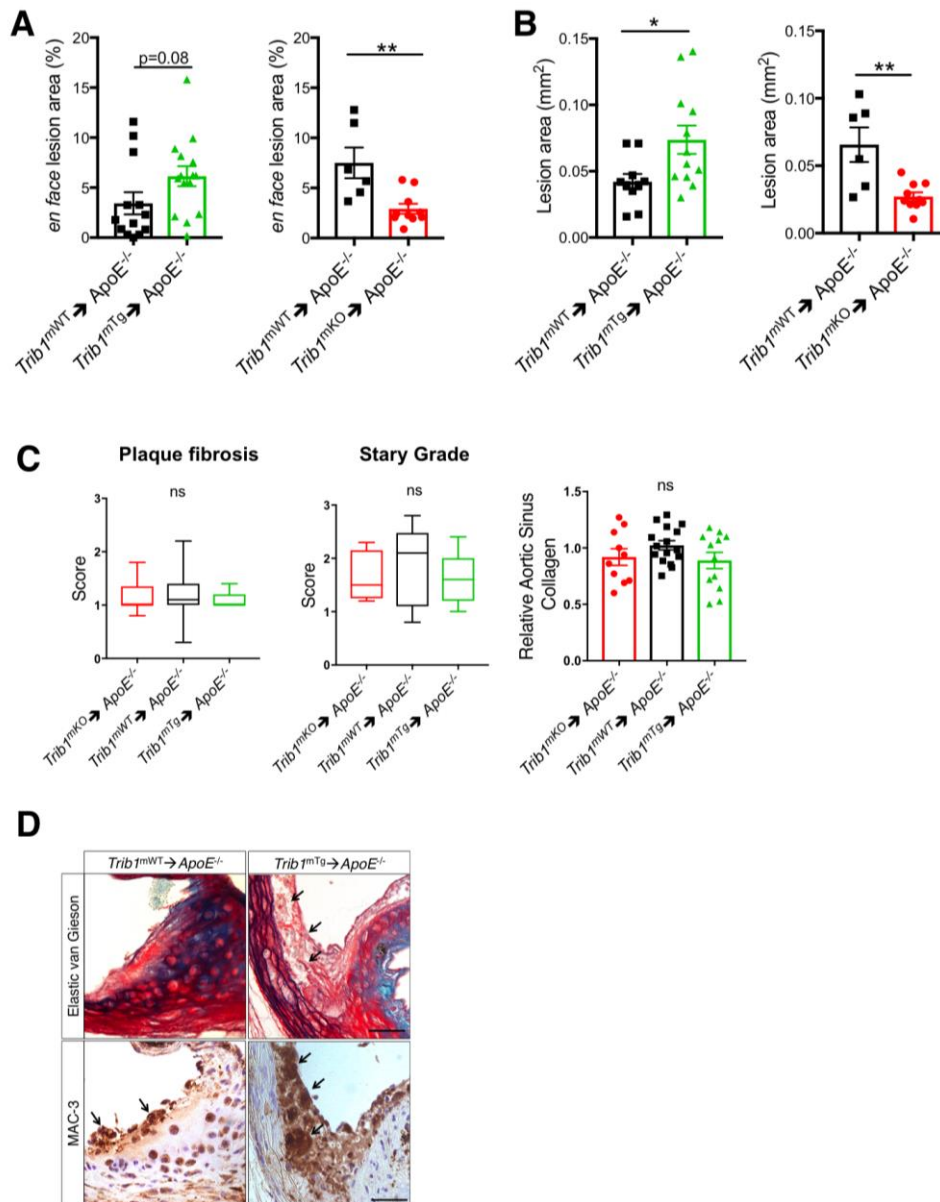

**Fig. S4. Atherosclerotic burden in  $mTrib1 \rightarrow ApoE^{-/-}$  mice, clinical grading of lesions, and presence of foam cells.** (A) *en face* oil Red O staining of the thoracic aortas (n=6-15, mean  $\pm$  SEM) and (B) lesion sizes in the aortic sinus (n=6-12, mean  $\pm$  SEM) of  $Trib1^{mWT} \rightarrow ApoE^{-/-}$  versus  $Trib1^{mTg} \rightarrow ApoE^{-/-}$  (left-hand panels) and  $Trib1^{mWT} \rightarrow ApoE^{-/-}$  versus  $Trib1^{mKO} \rightarrow ApoE^{-/-}$  (right-hand panels) mice. Data are expressed as a percentage (%) of total surface area of the whole aorta. (C) Pathological grading of aortic sinus lesions assessing plaque fibrosis (left panel) and overall Stary Grade (e.g. 1 = presence of macrophage foam cells, 2 = presence of intracellular lipid accumulation, 3 = presence of extracellular lipid pools) (centre panel) including features of necrosis and haemorrhage. Multiple lesions per mouse (n=10-16, mean  $\pm$  minimum and maximum) were scored indicate early stage lesions. Collagen content in the aortic sinus was quantified with Martius Scarlet Blue (right panel, n=10-16, mean  $\pm$  SEM). (D) Representative image of aortic sinus lesion (scale: 30 $\mu$ m) from  $mTrib1 \rightarrow ApoE^{-/-}$  mice, with arrows highlight foam cells. Significances were determined by student's t-test (A-B) or one-way ANOVA (C). Ns, non-significant, \* $P < 0.05$ , \*\* $P < 0.01$ .

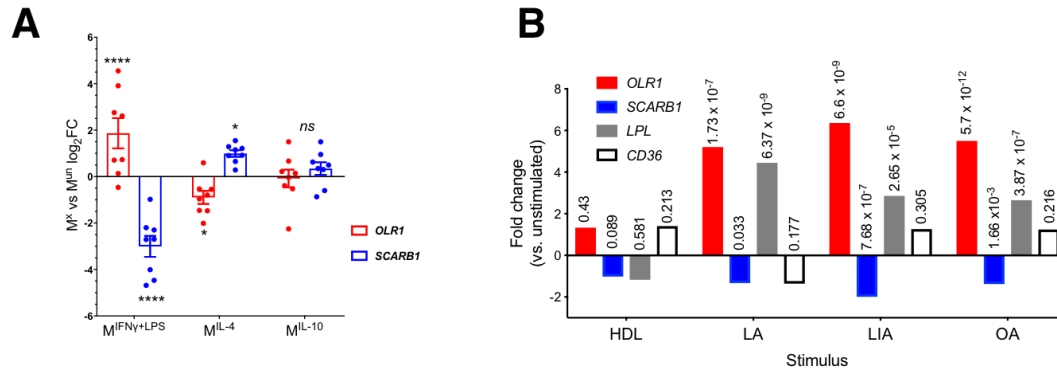

**Fig. S5. Reciprocal regulation of OLR1 and SCARB1 RNA levels in polarized MDMs.** (A) *OLR1* and *SCARB1* RNA levels were quantified by RT-qPCR in human MDMs polarised with interferon  $\gamma$  + lipopolysaccharide (IFN  $\gamma$  + LPS), IL-4 and IL-10. Each data point represents data from one donor (n=8). Log<sub>2</sub>-fold changes (mean  $\pm$  SEM) are plotted relative to non-polarised cells. (B) Fold-changes in levels of specified transcripts in human MDMs polarised with lauric acid (LA), linoleic acid (LIA), oleic and (OA) and HDL. Data were extracted from transcriptome analysis of Xue and colleagues (39).



**Table S1. Fold changes and *P* values of genes differentially expressed in both MDMs and monocytes.**

| Gene.ID                    | Monocyte-derived-Macrophages |                    |                    |                 |                 | Monocytes           |                    |                     |                    |                    |
|----------------------------|------------------------------|--------------------|--------------------|-----------------|-----------------|---------------------|--------------------|---------------------|--------------------|--------------------|
|                            | log.fold                     | fold.change        | t.statistics       | p.values        | q.values        | log.fold            | fold.change        | t.statistics        | p.values           | q.values           |
| AARS                       | -0.304137224                 | 0.809926432        | -8.782897728       | 1.31E-16        | 2.69E-14        | -0.065066552        | 0.95590122         | -3.843905469        | 0.000142206        | 0.001565015        |
| ABHD14A                    | -0.220750797                 | 0.858118744        | -8.037885032       | 2.20E-14        | 2.57E-12        | -0.098909216        | 0.9337387          | -5.156138259        | 4.09E-07           | 1.30E-05           |
| ACAT1                      | -0.148057487                 | 0.902464766        | -5.76394764        | 2.06E-08        | 5.23E-07        | -0.07291358         | 0.950716049        | -4.575812807        | 6.46E-06           | 0.000125567        |
| ADCY3                      | -0.254850629                 | 0.838073901        | -8.218052384       | 6.54E-15        | 9.18E-13        | -0.158691965        | 0.895836923        | -3.566095551        | 0.000409236        | 0.003567832        |
| <b>ADORA2B<sup>B</sup></b> | <b>-0.38349133</b>           | <b>0.766580215</b> | <b>-8.95060471</b> | <b>3.99E-17</b> | <b>8.90E-15</b> | <b>-0.102855836</b> | <b>0.931187866</b> | <b>-3.588055639</b> | <b>0.000377325</b> | <b>0.003367428</b> |
| AHR                        | 0.141652554                  | 1.103168031        | 4.970874874        | 1.13E-06        | 1.79E-05        | 0.16153246          | 1.118474573        | 5.087764035         | 5.74E-07           | 1.68E-05           |
| AKR7A2                     | -0.078918283                 | 0.946767257        | -3.488746621       | 0.000559022     | 0.003634005     | -0.072663646        | 0.950880766        | -4.49269597         | 9.38E-06           | 0.00017144         |
| ALDH3A2                    | -0.108851881                 | 0.927325749        | -3.553768781       | 0.00044182      | 0.002983349     | -0.083274197        | 0.943913003        | -4.0872901          | 5.34E-05           | 0.000715008        |
| ALG3                       | -0.085239414                 | 0.942628095        | -4.042024821       | 6.76E-05        | 0.000611276     | -0.052242293        | 0.964436199        | -3.536274173        | 0.000456637        | 0.003915552        |
| ALKBH7                     | -0.101966495                 | 0.931762068        | -4.386983346       | 1.60E-05        | 0.000180532     | -0.077062159        | 0.94798612         | -4.923005676        | 1.28E-06           | 3.35E-05           |
| ANAPC11                    | -0.085872707                 | 0.942214405        | -4.44761784        | 1.23E-05        | 0.000141461     | -0.05873906         | 0.960102899        | -3.585411076        | 0.00038104         | 0.003378556        |
| ANKRD37                    | 0.17271609                   | 1.127178572        | 4.329594849        | 2.05E-05        | 0.000222413     | 0.107501134         | 1.077360543        | 4.524879725         | 8.12E-06           | 0.000152942        |
| ANO7                       | 0.093401452                  | 1.066882616        | 4.001031406        | 7.98E-05        | 0.000706169     | 0.101983961         | 1.073248355        | 4.397662424         | 1.43E-05           | 0.000245118        |
| ANTXR2                     | 0.177347745                  | 1.130803101        | 6.150376873        | 2.50E-09        | 8.29E-08        | 0.122042637         | 1.088274604        | 5.997331838         | 4.72E-09           | 2.77E-07           |
| ARHGAP19                   | 0.128541933                  | 1.093188306        | 5.633869829        | 4.10E-08        | 9.67E-07        | 0.060538818         | 1.042855174        | 3.79454163          | 0.000172403        | 0.001818891        |
| ARID4A                     | 0.078770827                  | 1.056117847        | 3.729865936        | 0.000229583     | 0.001728025     | 0.062753195         | 1.04445707         | 3.724469238         | 0.000225804        | 0.00224404         |
| ARNTL                      | 0.077498448                  | 1.055186819        | 4.150248844        | 4.35E-05        | 0.000424794     | 0.105821071         | 1.076106654        | 5.110912101         | 5.12E-07           | 1.54E-05           |
| ATF3                       | 0.192376677                  | 1.142644544        | 3.71259996         | 0.000245077     | 0.001822696     | 0.402352716         | 1.321661491        | 9.92633625          | 9.00E-21           | 2.30E-18           |
| ATP6V1F                    | -0.089599337                 | 0.939783708        | -5.656464306       | 3.64E-08        | 8.79E-07        | -0.089599337        | 0.961284253        | -3.463365081        | 0.000595061        | 0.00485921         |
| ATPAF1                     | -0.073672061                 | 0.950216352        | -3.99988055        | 8.01E-05        | 0.00070889      | -0.064855686        | 0.956040946        | -4.070990188        | 5.71E-05           | 0.000758148        |
| BAZ1A                      | 0.074830962                  | 1.053237623        | 3.207162652        | 0.001487371     | 0.008220651     | 0.093386614         | 1.066871643        | 4.589957134         | 6.06E-06           | 0.000119581        |
| <b>BCL3</b>                | <b>0.239372378</b>           | <b>1.180479001</b> | <b>6.103909899</b> | <b>3.24E-09</b> | <b>1.04E-07</b> | <b>0.099144323</b>  | <b>1.071137971</b> | <b>3.292867123</b>  | <b>0.001085954</b> | <b>0.007829639</b> |
| BSCL2                      | -0.19840344                  | 0.871514492        | -5.868162062       | 1.18E-08        | 3.20E-07        | -0.107471522        | 0.928213431        | -3.947405377        | 9.43E-05           | 0.00113083         |
| BTG2                       | 0.317979002                  | 1.246583051        | 10.29838022        | 1.85E-21        | 1.16E-18        | 0.580118403         | 1.494971937        | 15.99920551         | 2.74E-44           | 2.14E-41           |

|               |                    |                    |                    |                    |                    |                    |                    |                    |                 |                 |
|---------------|--------------------|--------------------|--------------------|--------------------|--------------------|--------------------|--------------------|--------------------|-----------------|-----------------|
| C10orf59      | -0.158281039       | 0.896092123        | -5.486518069       | 8.81E-08           | 1.89E-06           | -0.072477235       | 0.951003638        | -3.68994754        | 0.000257517     | 0.002476517     |
| C12orf10      | -0.086294318       | 0.941939093        | -4.979681707       | 1.08E-06           | 1.74E-05           | -0.07205218        | 0.951283869        | -4.289748921       | 2.28E-05        | 0.000360624     |
| C12orf52      | -0.086294318       | 0.941939093        | -4.979681707       | 1.08E-06           | 1.74E-05           | -0.07205218        | 0.951283869        | -4.289748921       | 2.28E-05        | 0.000360624     |
| C13orf18      | 0.440171348        | 1.35676546         | 8.548328088        | 6.77E-16           | 1.16E-13           | 0.187277971        | 1.13861339         | 4.8072306          | 2.22E-06        | 5.18E-05        |
| C16orf7       | 0.174663087        | 1.128700788        | 8.090312857        | 1.55E-14           | 1.90E-12           | 0.09825619         | 1.070478774        | 4.426983893        | 1.25E-05        | 0.000219117     |
| C17orf101     | -0.130454337       | 0.913543709        | -5.174329622       | 4.23E-07           | 7.47E-06           | -0.057615887       | 0.960850654        | -3.309233856       | 0.001026123     | 0.00748459      |
| C3orf62       | 0.129900536        | 1.094218259        | 5.19385354         | 3.84E-07           | 6.90E-06           | 0.088406916        | 1.063195509        | 4.597797245        | 5.85E-06        | 0.00011629      |
| C5orf5        | 0.157784854        | 1.115572947        | 6.439594797        | 4.83E-10           | 1.92E-08           | 0.083170164        | 1.059343276        | 5.789485938        | 1.49E-08        | 7.56E-07        |
| C5orf54       | -0.112721816       | 0.924841591        | -4.320203558       | 2.13E-05           | 0.000229811        | -0.089628436       | 0.939764753        | -4.20260421        | 3.30E-05        | 0.000485327     |
| C7orf43       | 0.161297182        | 1.118292185        | 6.292869891        | 1.12E-09           | 4.00E-08           | 0.101608485        | 1.072969067        | 5.209504439        | 3.13E-07        | 1.02E-05        |
| C7orf50       | -0.235472322       | 0.849406868        | -6.936902928       | 2.53E-11           | 1.48E-09           | -0.145898378       | 0.903816389        | -6.128250632       | 2.25E-09        | 1.44E-07        |
| C8orf55       | -0.11191407        | 0.925359543        | -3.556928637       | 0.000436758        | 0.002956334        | -0.092692092       | 0.937771219        | -4.065064582       | 5.85E-05        | 0.000772729     |
| CALN1         | -0.080819265       | 0.94552056         | -4.500936477       | 9.74E-06           | 0.000115383        | -0.054749069       | 0.962761884        | -3.434654998       | 0.000659637     | 0.005242707     |
| CAPG          | -0.16007424        | 0.894979015        | -5.987681627       | 6.15E-09           | 1.82E-07           | -0.087814056       | 0.940947375        | -3.291216034       | 0.001092166     | 0.007865358     |
| <b>CCL3</b>   | <b>0.38427235</b>  | <b>1.305201319</b> | <b>7.108286426</b> | <b>8.83E-12</b>    | <b>5.78E-10</b>    | <b>1.350292888</b> | <b>2.549638815</b> | <b>18.66363469</b> | <b>1.89E-55</b> | <b>3.94E-52</b> |
| <b>CCL3L1</b> | <b>0.396937255</b> | <b>1.316709655</b> | <b>6.695411776</b> | <b>1.08E-10</b>    | <b>5.17E-09</b>    | <b>1.183835398</b> | <b>2.271799317</b> | <b>16.59021024</b> | <b>9.55E-47</b> | <b>8.53E-44</b> |
| <b>CCL3L3</b> | <b>0.365258445</b> | <b>1.288112362</b> | <b>6.653247048</b> | <b>1.39E-10</b>    | <b>6.42E-09</b>    | <b>1.356130877</b> | <b>2.559977051</b> | <b>18.18283748</b> | <b>2.01E-53</b> | <b>3.58E-50</b> |
| <b>CCL4L1</b> | <b>0.457586749</b> | <b>1.373242821</b> | <b>4.221349367</b> | <b>3.23E-05</b>    | <b>0.000328203</b> | <b>0.611835011</b> | <b>1.528201743</b> | <b>8.981062111</b> | <b>1.32E-17</b> | <b>2.47E-15</b> |
| <b>CCL8</b>   | <b>0.443291864</b> | <b>1.359703288</b> | <b>4.679551789</b> | <b>4.38E-06</b>    | <b>5.80E-05</b>    | <b>0.30255706</b>  | <b>1.233328452</b> | <b>5.075349313</b> | <b>6.10E-07</b> | <b>1.76E-05</b> |
| CCNG1         | -0.149122761       | 0.901798639        | -6.072737251       | 3.85E-09           | 1.20E-07           | -0.089554517       | 0.939812905        | -4.530583694       | 7.92E-06        | 0.00014953      |
| <b>CD44</b>   | <b>0.139235411</b> | <b>1.101321291</b> | <b>3.642123264</b> | <b>0.000319136</b> | <b>0.002274711</b> | <b>0.201566466</b> | <b>1.149946279</b> | <b>6.311093458</b> | <b>7.82E-10</b> | <b>5.53E-08</b> |
| CDK4          | -0.199216252       | 0.871023621        | -12.63759225       | 1.43E-29           | 2.99E-26           | -0.070434918       | 0.952350857        | -4.043999928       | 6.38E-05        | 0.000827016     |
| CEBPD         | 0.305118352        | 1.235519989        | 6.297963502        | 1.09E-09           | 3.92E-08           | 0.100837452        | 1.072395784        | 4.908522132        | 1.37E-06        | 3.56E-05        |
| CHD4          | 0.101034254        | 1.072542082        | 6.14094502         | 2.64E-09           | 8.65E-08           | 0.050802633        | 1.035841046        | 3.737161807        | 0.000215099     | 0.002161709     |
| CHMP4A        | -0.085559725       | 0.942418833        | -4.873877062       | 1.79E-06           | 2.65E-05           | -0.085559725       | 0.942418833        | -4.873877062       | 1.79E-06        | 2.65E-05        |
| CHSY1         | 0.103633518        | 1.074476193        | 5.740719898        | 2.33E-08           | 5.89E-07           | 0.103633518        | 1.074476193        | 5.740719898        | 2.33E-08        | 5.89E-07        |
| CKLF          | 0.074151743        | 1.052741877        | 3.477736813        | 0.000581543        | 0.003753458        | 0.050100111        | 1.035336765        | 3.260562118        | 0.001213668     | 0.008541134     |

|               |                    |                    |                    |                    |                    |                    |                    |                    |                 |                 |
|---------------|--------------------|--------------------|--------------------|--------------------|--------------------|--------------------|--------------------|--------------------|-----------------|-----------------|
| COMMD1        | -0.082609651       | 0.944347896        | -4.604258254       | 6.15E-06           | 7.78E-05           | -0.047869247       | 0.967363999        | -3.71226477        | 0.000236569     | 0.002332486     |
| COPE          | -0.075498487       | 0.949014157        | -4.5646801         | 7.34E-06           | 9.05E-05           | -0.065378476       | 0.955694568        | -4.605004898       | 5.66E-06        | 0.000113709     |
| CSNK1D        | 0.108421214        | 1.078047849        | 4.826411032        | 2.23E-06           | 3.22E-05           | 0.065883588        | 1.046725817        | 3.490105454        | 0.000540274     | 0.004500007     |
| CUTA          | -0.108198671       | 0.927745709        | -5.822249075       | 1.51E-08           | 3.98E-07           | -0.057230143       | 0.961107598        | -3.528101273       | 0.000470499     | 0.004017879     |
| <b>CXCL1</b>  | <b>0.208085468</b> | <b>1.155154216</b> | <b>3.718390564</b> | <b>0.000239774</b> | <b>0.001786445</b> | <b>0.198932598</b> | <b>1.147848786</b> | <b>5.388836063</b> | <b>1.26E-07</b> | <b>4.79E-06</b> |
| CYB5R1        | -0.098718605       | 0.933862075        | -3.406825538       | 0.000748195        | 0.004646763        | -0.093376272       | 0.937326599        | -4.823836772       | 2.05E-06        | 4.87E-05        |
| DDB1          | -0.125380561       | 0.916762183        | -6.437434951       | 4.89E-10           | 1.94E-08           | -0.059148032       | 0.95983077         | -4.002319239       | 7.56E-05        | 0.000937202     |
| DDOST         | -0.101472284       | 0.932081308        | -6.219947453       | 1.69E-09           | 5.86E-08           | -0.057537999       | 0.960902529        | -3.678439906       | 0.000268988     | 0.00256318      |
| DKFZP586I1420 | 0.127170188        | 1.092149374        | 3.999501173        | 8.02E-05           | 0.000708965        | 0.061911947        | 1.043848215        | 3.211191243        | 0.001435988     | 0.009815595     |
| DLG4          | 0.185386394        | 1.137121485        | 5.193134341        | 3.85E-07           | 6.91E-06           | 0.125289074        | 1.090726261        | 5.017737027        | 8.09E-07        | 2.25E-05        |
| DPH5          | -0.080067353       | 0.946013481        | -3.677591437       | 0.000279567        | 0.002037985        | -0.106135083       | 0.929073679        | -5.056742829       | 6.69E-07        | 1.91E-05        |
| DPP7          | -0.18572505        | 0.879207105        | -5.217748514       | 3.41E-07           | 6.20E-06           | -0.086494053       | 0.941808695        | -3.248800407       | 0.001263528     | 0.008824934     |
| DUSP2         | 0.251213063        | 1.190207458        | 4.527844672        | 8.65E-06           | 0.000104142        | 0.267930924        | 1.204079729        | 8.267138396        | 2.41E-15        | 3.83E-13        |
| DUSP5         | 0.345577117        | 1.270659179        | 5.615939962        | 4.50E-08           | 1.05E-06           | 0.248670417        | 1.18811165         | 6.113623253        | 2.45E-09        | 1.55E-07        |
| DUSP6         | 0.617173415        | 1.533867023        | 10.84644877        | 2.66E-23           | 2.56E-20           | 0.127606397        | 1.092479643        | 4.585820364        | 6.17E-06        | 0.000121206     |
| DYRK4         | -0.083253511       | 0.943926537        | -3.277634972       | 0.00117149         | 0.006764882        | -0.065051267       | 0.955911348        | -3.570305093       | 0.000402929     | 0.003525139     |
| ECE2          | -0.096879762       | 0.935053124        | -3.192732554       | 0.001561088        | 0.008518869        | -0.082940526       | 0.94413134         | -3.565808922       | 0.000409669     | 0.003569116     |
| EGR1          | 0.599880182        | 1.51559069         | 9.430304225        | 1.24E-18           | 4.43E-16           | 1.258557259        | 2.392563572        | 19.80372323        | 2.96E-60        | 9.25E-57        |
| EGR2          | 0.202074918        | 1.150351628        | 4.861143979        | 1.90E-06           | 2.79E-05           | 1.419755997        | 2.675402581        | 20.29344534        | 2.56E-62        | 1.07E-58        |
| EI24          | -0.079329175       | 0.946497648        | -4.519105676       | 8.99E-06           | 0.000107518        | -0.051303562       | 0.965063941        | -3.457970981       | 0.000606724     | 0.004919106     |
| ENOPH1        | -0.074301387       | 0.949801943        | -4.475165863       | 1.09E-05           | 0.000127401        | -0.059563646       | 0.9595543          | -4.272964366       | 2.45E-05        | 0.000380763     |
| EPRS          | -0.15026855        | 0.901082715        | -5.932946066       | 8.30E-09           | 2.39E-07           | -0.061128713       | 0.958513919        | -4.263150673       | 2.55E-05        | 0.000393711     |
| ESYT1         | -0.190315618       | 0.876413968        | -9.160527393       | 8.84E-18           | 2.63E-15           | -0.072486285       | 0.950997672        | -4.392510335       | 1.46E-05        | 0.000250022     |
| ETFB          | -0.072510777       | 0.950981528        |                    | 0.001029572        | 0.00608304         | -0.093150543       | 0.937473267        |                    | 1.81E-07        | 6.53E-06        |
| EXOSC8        | -0.083520291       | 0.943752005        | -3.929664884       | 0.000105948        | 0.000896631        | -0.081954207       | 0.944777029        | -4.589360716       | 6.07E-06        | 0.000119581     |
| FAHD1         | -0.07766145        | 0.947592411        | -3.285440488       | 0.001140629        | 0.006635713        | -0.095970654       | 0.93564253         | -4.476082801       | 1.01E-05        | 0.000183254     |
| FAM100B       | 0.212890808        | 1.159008228        | 7.558018214        | 5.16E-13           | 4.48E-11           | 0.137711156        | 1.100158323        | 5.632013658        | 3.50E-08        | 1.60E-06        |

|              |                    |                    |                    |                    |                    |                    |                    |                    |                 |                    |
|--------------|--------------------|--------------------|--------------------|--------------------|--------------------|--------------------|--------------------|--------------------|-----------------|--------------------|
| FAM118B      | -0.039101255       | 0.973261064        | -2.099472163       | 0.036621846        | 0.103678967        | -0.074048542       | 0.949968419        | -3.367241862       | 0.000837856     | 0.00638323         |
| FAM195A      | -0.100127511       | 0.93295053         | -3.657724447       | 0.000301123        | 0.002167319        | -0.105636622       | 0.929394736        | -4.066454887       | 5.82E-05        | 0.000770772        |
| FBXO6        | -0.13334427        | 0.911715577        | -5.566207073       | 5.84E-08           | 1.33E-06           | -0.082624987       | 0.944337858        | -3.373696546       | 0.000819025     | 0.006262664        |
| FBXW4        | -0.086993261       | 0.941482863        | -4.159134352       | 4.19E-05           | 0.000412415        | -0.06923469        | 0.95314348         | -3.66070969        | 0.000287609     | 0.002703522        |
| FCGR2A       | 0.32179637         | 1.249885874        | 5.160308831        | 4.53E-07           | 7.90E-06           | 0.117075212        | 1.084533947        | 4.202750242        | 3.30E-05        | 0.000485327        |
| FGD4         | 0.114919685        | 1.082914758        | 3.898180416        | 0.000119935        | 0.000995637        | 0.155052231        | 1.113461929        | 8.36898061         | 1.16E-15        | 1.94E-13           |
| <b>FOS</b>   | <b>0.607372682</b> | <b>1.52348224</b>  | <b>12.69986367</b> | <b>8.57E-30</b>    | <b>2.14E-26</b>    | <b>0.673150675</b> | <b>1.59455148</b>  | <b>18.78229875</b> | <b>5.99E-56</b> | <b>1.50E-52</b>    |
| FOSB         | 0.139458541        | 1.101491637        | 3.227001728        | 0.001391276        | 0.007765888        | 1.072955623        | 2.103738847        | 16.79284667        | 1.36E-47        | 1.31E-44           |
| <b>FPR2</b>  | <b>0.241812782</b> | <b>1.18247754</b>  | <b>3.634792169</b> | <b>0.000327947</b> | <b>0.002325577</b> | <b>0.137361934</b> | <b>1.099892049</b> | <b>3.936734577</b> | <b>9.85E-05</b> | <b>0.001174557</b> |
| FTSJ2        | -0.076121105       | 0.948604682        | -3.340020497       | 0.000945058        | 0.005664003        | -0.083432251       | 0.943809598        | -4.214313827       | 3.14E-05        | 0.000464933        |
| FUCA1        | -0.210440731       | 0.864273163        | -3.672468488       | 0.000284982        | 0.002072625        | -0.139875517       | 0.907597464        | -4.562902241       | 6.85E-06        | 0.000131676        |
| FUT4         | 0.083736683        | 1.059759341        | 4.226694855        | 3.16E-05           | 0.000322511        | 0.115221443        | 1.083141287        | 5.858180876        | 1.02E-08        | 5.43E-07           |
| GABARAPL1    | 0.116479255        | 1.084086034        | 5.081546127        | 6.64E-07           | 1.12E-05           | 0.209678591        | 1.156430522        | 7.69540838         | 1.26E-13        | 1.64E-11           |
| GALIG        | -0.286607221       | 0.819827778        | -6.488811919       | 3.63E-10           | 1.50E-08           | -0.079678483       | 0.946268507        | -3.329186033       | 0.000957329     | 0.007077784        |
| GALK1        | -0.12262555        | 0.918514531        | -6.161118128       | 2.35E-09           | 7.89E-08           | -0.044274495       | 0.969777377        | -3.210798353       | 0.0014379       | 0.00982329         |
| GNPDA1       | -0.080019859       | 0.946044624        | -3.310231335       | 0.00104755         | 0.006177582        | -0.07734392        | 0.947800995        | -4.305833639       | 2.13E-05        | 0.000340155        |
| GSTP1        | -0.146655732       | 0.903342047        | -6.930011316       | 2.63E-11           | 1.53E-09           | -0.076741426       | 0.948196895        | -4.838159566       | 1.92E-06        | 4.62E-05           |
| GTPBP6       | -0.095082032       | 0.936219012        | -4.005697416       | 7.83E-05           | 0.000697101        | -0.09003803        | 0.939497983        | -4.428348747       | 1.25E-05        | 0.000218109        |
| H3F3B        | 0.272530861        | 1.207924984        | 9.179393049        | 7.71E-18           | 2.41E-15           | 0.231557338        | 1.174101667        | 13.2209369         | 5.06E-33        | 2.34E-30           |
| <b>HBEGF</b> | <b>0.76361341</b>  | <b>1.697737499</b> | <b>10.26440275</b> | <b>2.40E-21</b>    | <b>1.43E-18</b>    | <b>0.546514932</b> | <b>1.460553224</b> | <b>12.21082218</b> | <b>4.22E-29</b> | <b>1.51E-26</b>    |
| HDDC3        | -0.08217459        | 0.944632718        | -3.739321844       | 0.000221494        | 0.001677239        | -0.082304525       | 0.944547644        | -4.780695413       | 2.51E-06        | 5.72E-05           |
| HDHD2        | -0.090442368       | 0.939234711        | -4.118348867       | 4.96E-05           | 0.000471872        | -0.071304686       | 0.951776879        | -3.717504091       | 0.00023189      | 0.00229904         |
| HEATR1       | -0.073536338       | 0.950305749        | -3.514536055       | 0.000509426        | 0.00335379         | -0.107852143       | 0.927968576        | -4.336499811       | 1.86E-05        | 0.000307164        |
| HEBP1        | -0.240535578       | 0.84643103         | -8.917098822       | 5.06E-17           | 1.09E-14           | -0.066761639       | 0.954778749        | -4.30180895        | 2.16E-05        | 0.000345477        |
| HECA         | 0.107416644        | 1.07729745         | 3.952383836        | 9.68E-05           | 0.000831447        | 0.067760897        | 1.048088757        | 3.574215195        | 0.000397153     | 0.003484356        |
| HMG2         | -0.078167397       | 0.947260153        | -3.284264147       | 0.001145231        | 0.00664702         | -0.063817873       | 0.956728929        | -3.248606943       | 0.001264364     | 0.008825841        |
| IARS         | -0.159480841       | 0.895347207        | -3.828475122       | 0.000157377        | 0.001248428        | -0.031125924       | 0.978656226        | -2.011458458       | 0.044992061     | 0.135409424        |

|               |                    |                    |                    |                    |                    |                    |                    |                    |                    |                    |
|---------------|--------------------|--------------------|--------------------|--------------------|--------------------|--------------------|--------------------|--------------------|--------------------|--------------------|
| IDH1          | -0.140574103       | 0.907158091        | -6.634017257       | 1.55E-10           | 7.08E-09           | -0.057706131       | 0.960790551        | -3.782111794       | 0.00018091         | 0.001888821        |
| IER2          | 0.13043528         | 1.094623913        | 5.14783564         | 4.81E-07           | 8.38E-06           | 0.549308043        | 1.463383647        | 14.72511368        | 4.73E-39           | 2.82E-36           |
| IGFBP6        | 0.369741009        | 1.29212085         | 6.313516874        | 9.96E-10           | 3.62E-08           | 0.084196228        | 1.060096963        | 3.815459833        | 0.000158934        | 0.001707035        |
| IIP45         | 0.10876382         | 1.078303891        | 3.18207532         | 0.001617687        | 0.008793184        | 0.088757659        | 1.063454021        | 3.533027491        | 0.000462097        | 0.003959656        |
| <b>IL1R2</b>  | <b>0.535136879</b> | <b>1.449079633</b> | <b>6.47478239</b>  | <b>3.94E-10</b>    | <b>1.61E-08</b>    | <b>0.371667432</b> | <b>1.293847364</b> | <b>5.229013227</b> | <b>2.84E-07</b>    | <b>9.49E-06</b>    |
| <b>IL1RN</b>  | <b>0.439358621</b> | <b>1.356001356</b> | <b>5.922585133</b> | <b>8.78E-09</b>    | <b>2.51E-07</b>    | <b>0.080060824</b> | <b>1.057062605</b> | <b>3.58684789</b>  | <b>0.000379017</b> | <b>0.003367428</b> |
| IMP4          | -0.105262596       | 0.929635717        | -4.660880202       | 4.77E-06           | 6.22E-05           | -0.061355292       | 0.958363394        | -3.423122372       | 0.000687373        | 0.005428638        |
| INSIG1        | 0.193337718        | 1.143405962        | 3.713048242        | 0.000244662        | 0.001821781        | 0.169977104        | 1.12504063         | 4.859926899        | 1.73E-06           | 4.25E-05           |
| INTS3         | 0.103182485        | 1.07414033         | 5.160299818        | 4.53E-07           | 7.90E-06           | 0.086771678        | 1.061991102        | 5.234630776        | 2.76E-07           | 9.27E-06           |
| IQSEC1        | 0.12637329         | 1.091546273        | 5.633176387        | 4.12E-08           | 9.69E-07           | 0.062226696        | 1.044075974        | 3.914810181        | 0.00010746         | 0.001260318        |
| ITPRIP        | 0.150137503        | 1.10967523         | 5.616852915        | 4.48E-08           | 1.05E-06           | 0.12930644         | 1.093767758        | 6.8158206          | 3.75E-11           | 3.76E-09           |
| JUNB          | 0.303513913        | 1.234146716        | 8.533676014        | 7.49E-16           | 1.27E-13           | 0.528021491        | 1.441950351        | 14.33023008        | 1.89E-37           | 1.03E-34           |
| JUND          | 0.091852088        | 1.065737466        | 4.325519724        | 2.08E-05           | 0.000225438        | 0.190486606        | 1.141148549        | 10.46591196        | 1.16E-22           | 3.31E-20           |
| <b>KDM6B</b>  | <b>0.134598218</b> | <b>1.097787044</b> | <b>3.779738623</b> | <b>0.000189856</b> | <b>0.001467891</b> | <b>0.135263623</b> | <b>1.098293486</b> | <b>4.643552159</b> | <b>4.74E-06</b>    | <b>9.87E-05</b>    |
| KIAA0247      | 0.150819664        | 1.11020005         | 6.861205738        | 4.00E-11           | 2.21E-09           | 0.067099528        | 1.047608396        | 3.713980573        | 0.000235027        | 0.002322776        |
| KLK7          | 0.097379743        | 1.069828649        | 4.375426099        | 1.68E-05           | 0.000187718        | 0.109934104        | 1.079178943        | 5.125490873        | 4.76E-07           | 1.46E-05           |
| LCTL          | -0.073382755       | 0.95040692         | -3.524884704       | 0.000490709        | 0.003251231        | -0.077897206       | 0.947437574        | -3.830133355       | 0.000150085        | 0.00162456         |
| LGALS3        | -0.302035982       | 0.811106925        | -8.011439364       | 2.63E-14           | 3.01E-12           | -0.095920296       | 0.935675189        | -3.766314934       | 0.000192294        | 0.001973778        |
| LHPP          | -0.187064511       | 0.87839119         | -4.410614108       | 1.44E-05           | 0.000164483        | -0.123066078       | 0.918234104        | -5.12094427        | 4.87E-07           | 1.48E-05           |
| <b>LILRB2</b> | <b>0.281246918</b> | <b>1.215244764</b> | <b>5.874882157</b> | <b>1.14E-08</b>    | <b>3.10E-07</b>    | <b>0.07711268</b>  | <b>1.054904706</b> | <b>4.273221879</b> | <b>2.45E-05</b>    | <b>0.000380763</b> |
| LRRC41        | -0.111440257       | 0.925663501        | -3.729580825       | 0.000229831        | 0.001728852        | -0.084673072       | 0.942998204        | -3.586684787       | 0.000379246        | 0.003367428        |
| LRRC42        | -0.081547692       | 0.945043281        | -4.421582938       | 1.38E-05           | 0.000157415        | -0.052551539       | 0.964229491        | -3.385452136       | 0.000785739        | 0.006048832        |
| LRRC8C        | 0.15506471         | 1.11347156         | 4.456437389        | 1.18E-05           | 0.000136621        | 0.148366148        | 1.108313596        | 5.092897854        | 5.60E-07           | 1.66E-05           |
| LSMD1         | -0.08660218        | 0.941738111        | -4.270120473       | 2.63E-05           | 0.000274272        | -0.065416821       | 0.955669167        | -3.590226823       | 0.0003743          | 0.003349675        |
| <b>LYN</b>    | <b>0.124278318</b> | <b>1.089962363</b> | <b>5.19724828</b>  | <b>3.78E-07</b>    | <b>6.81E-06</b>    | <b>0.110701754</b> | <b>1.079753321</b> | <b>6.094186571</b> | <b>2.73E-09</b>    | <b>1.72E-07</b>    |
| MACROD1       | -0.156854275       | 0.896978758        | -4.67686575        | 4.43E-06           | 5.84E-05           | -0.07415812        | 0.949896268        | -3.334758741       | 0.000938896        | 0.006982795        |
| MAFB          | 0.144881451        | 1.105639797        | 3.313932327        | 0.001034277        | 0.006107949        | 0.21383436         | 1.159766491        | 8.72348876         | 8.92E-17           | 1.56E-14           |

|               |                     |                    |                     |                 |                    |                     |                    |                     |                    |                    |
|---------------|---------------------|--------------------|---------------------|-----------------|--------------------|---------------------|--------------------|---------------------|--------------------|--------------------|
| MAP1LC3A      | 0.428650969         | 1.345974399        | 8.976695553         | 3.31E-17        | 7.80E-15           | 0.193058166         | 1.143184425        | 4.721697731         | 3.31E-06           | 7.22E-05           |
| MAP3K7IP2     | 0.086358869         | 1.06168727         | 3.27720179          | 0.001173225     | 0.006771774        | 0.083928212         | 1.059900042        | 3.738332282         | 0.000214136        | 0.002159982        |
| MAPKAPK2      | 0.088045712         | 1.062929353        | 3.230745927         | 0.001373798     | 0.007690295        | 0.096529561         | 1.069198383        | 4.088519704         | 5.31E-05           | 0.000712153        |
| MCL1          | 0.113188597         | 1.081616149        | 4.497360535         | 9.89E-06        | 0.000116992        | 0.242797132         | 1.18328462         | 10.53243128         | 6.75E-23           | 2.01E-20           |
| MCTP2         | 0.160146787         | 1.117400822        | 4.228528075         | 3.14E-05        | 0.000320567        | 0.15025669          | 1.109766908        | 3.724563015         | 0.000225723        | 0.00224404         |
| MFNG          | -0.154402077        | 0.89850468         | -6.075223264        | 3.80E-09        | 1.19E-07           | -0.063995929        | 0.956610857        | -4.649530344        | 4.62E-06           | 9.64E-05           |
| MGAM          | 0.098685744         | 1.07079755         | 3.32953704          | 0.000980012     | 0.005845474        | 0.184650242         | 1.136541404        | 4.182544336         | 3.59E-05           | 0.000518822        |
| MIDN          | 0.125505973         | 1.090890256        | 5.564850505         | 5.88E-08        | 1.33E-06           | 0.156433573         | 1.114528549        | 8.266422367         | 2.42E-15           | 3.83E-13           |
| MRPL48        | -0.104044308        | 0.930421082        | -3.66205612         | 0.000296293     | 0.002141191        | -0.076004498        | 0.948681358        | -4.005017281        | 7.48E-05           | 0.000929398        |
| MSL3          | 0.097200767         | 1.069695937        | 3.910750445         | 0.000114153     | 0.000952697        | 0.062734517         | 1.044443548        | 3.926668085         | 0.000102499        | 0.00121349         |
| MUSK          | -0.094047769        | 0.936890425        | -4.882702196        | 1.71E-06        | 2.57E-05           | -0.061788393        | 0.958075733        | -3.416592166        | 0.000703557        | 0.005528514        |
| MXD1          | 0.122354214         | 1.088509662        | 3.19508589          | 0.00154884      | 0.008470515        | 0.238570051         | 1.179822682        | 6.647594105         | 1.05E-10           | 9.27E-09           |
| MYST3         | 0.10262168          | 1.073722871        | 3.367407341         | 0.000859143     | 0.005229313        | 0.133614279         | 1.097038593        | 5.215322173         | 3.04E-07           | 1.01E-05           |
| NDUFAF2       | -0.106635181        | 0.928751679        | -4.894592217        | 1.62E-06        | 2.44E-05           | -0.065102849        | 0.955877171        | -3.695443793        | 0.000252201        | 0.002446978        |
| NDUFS3        | -0.110578468        | 0.926216608        | -4.935707217        | 1.34E-06        | 2.07E-05           | -0.114339926        | 0.923804881        | -8.126974477        | 6.46E-15           | 9.85E-13           |
| NENF          | -0.156982628        | 0.896898959        | -5.421725918        | 1.23E-07        | 2.52E-06           | -0.074490091        | 0.949677717        | -3.234726814        | 0.001325682        | 0.00916686         |
| <b>NFKBIZ</b> | <b>0.347874164</b>  | <b>1.272683923</b> | <b>7.267250879</b>  | <b>3.28E-12</b> | <b>2.38E-10</b>    | <b>0.45296965</b>   | <b>1.368855016</b> | <b>17.01467971</b>  | <b>1.61E-48</b>    | <b>1.83E-45</b>    |
| <b>NFX1</b>   | <b>-0.089432833</b> | <b>0.939892177</b> | <b>-5.033396996</b> | <b>8.38E-07</b> | <b>1.38E-05</b>    | <b>-0.056539121</b> | <b>0.961568059</b> | <b>-3.622581058</b> | <b>0.000331836</b> | <b>0.003048213</b> |
| NIT2          | -0.101571536        | 0.932017187        | -4.748863094        | 3.19E-06        | 4.42E-05           | -0.086244685        | 0.941971499        | -4.765017102        | 2.70E-06           | 6.07E-05           |
| <b>NLRP3</b>  | <b>0.221092397</b>  | <b>1.165615847</b> | <b>4.100077147</b>  | <b>5.34E-05</b> | <b>0.000502789</b> | <b>0.076727127</b>  | <b>1.054622826</b> | <b>4.343716761</b>  | <b>1.81E-05</b>    | <b>0.000300174</b> |
| NMRAL1        | -0.085638949        | 0.942367083        | -3.353984697        | 0.000900298     | 0.005442712        | -0.080977831        | 0.945416644        | -4.640768734        | 4.81E-06           | 9.96E-05           |
| NPTN          | 0.099185878         | 1.071168824        | 6.70178539          | 1.04E-10        | 5.00E-09           | 0.043258145         | 1.030438316        | 3.398397344         | 0.000750544        | 0.005817299        |
| NR2C2AP       | -0.100623338        | 0.932629948        | -3.917973783        | 0.000110951     | 0.000929187        | -0.088165754        | 0.940718021        | -4.161258603        | 3.93E-05           | 0.000558092        |
| NSMCE2        | -0.152545494        | 0.899661697        | -6.588525854        | 2.03E-10        | 8.90E-09           | -0.059179036        | 0.959810143        | -4.029542009        | 6.77E-05           | 0.000864092        |
| NUBP1         | -0.085481669        | 0.942469823        | -4.02009873         | 7.39E-05        | 0.000663469        | -0.052435844        | 0.96430682         | -4.081918351        | 5.46E-05           | 0.000730235        |
| <b>OSM</b>    | <b>0.321101239</b>  | <b>1.24928379</b>  | <b>5.800203377</b>  | <b>1.70E-08</b> | <b>4.42E-07</b>    | <b>0.700639974</b>  | <b>1.625225576</b> | <b>15.24872599</b>  | <b>3.42E-41</b>    | <b>2.25E-38</b>    |
| PDCL3         | -0.082740008        | 0.944262572        | -3.824633135        | 0.000159733     | 0.001265513        | -0.050043586        | 0.965907147        | -3.267262309        | 0.001186087        | 0.008401392        |

|               |                    |                    |                    |                 |                 |                    |                    |                    |                    |                    |
|---------------|--------------------|--------------------|--------------------|-----------------|-----------------|--------------------|--------------------|--------------------|--------------------|--------------------|
| PDE4B         | 0.327127017        | 1.254512649        | 5.714525947        | 2.68E-08        | 6.72E-07        | 0.160562852        | 1.117723121        | 4.065153201        | 5.85E-05           | 0.000772729        |
| PDIA5         | -0.193318073       | 0.874591921        | -5.466876833       | 9.74E-08        | 2.06E-06        | -0.095870481       | 0.935707498        | -4.398492832       | 1.42E-05           | 0.000244593        |
| PDLIM4        | 0.178257976        | 1.131516777        | 3.871595217        | 0.000133091     | 0.001088233     | 0.068099831        | 1.048335015        | 3.27579928         | 0.001151787        | 0.008233069        |
| PDS5B         | 0.079997806        | 1.057016433        | 3.381533147        | 0.000817731     | 0.005013863     | 0.06686481         | 1.047437971        | 3.764787918        | 0.00019343         | 0.001983805        |
| PDXP          | -0.118804266       | 0.920950636        | -5.028452585       | 8.58E-07        | 1.41E-05        | -0.089541741       | 0.939821228        | -4.275920652       | 2.42E-05           | 0.000377386        |
| PEMT          | -0.137906939       | 0.908836739        | -5.568717429       | 5.76E-08        | 1.32E-06        | -0.068638674       | 0.953537331        | -3.740529268       | 0.00021234         | 0.002149535        |
| PEPD          | -0.130715773       | 0.913378178        | -6.822591139       | 5.05E-11        | 2.71E-09        | -0.048453321       | 0.966972442        | -3.315473055       | 0.001004132        | 0.007345616        |
| PHACTR2       | 0.114677963        | 1.082733332        | 4.647679352        | 5.06E-06        | 6.57E-05        | 0.096806678        | 1.069403778        | 4.486815565        | 9.63E-06           | 0.0001754          |
| PIK3CD        | 0.075858421        | 1.053987985        | 3.304209788        | 0.001069486     | 0.006295061     | 0.063236491        | 1.044807017        | 3.651845782        | 0.000297366        | 0.002776453        |
| PIK3CG        | 0.128019611        | 1.092792593        | 3.948743786        | 9.82E-05        | 0.000840657     | 0.102561997        | 1.073678453        | 3.896477026        | 0.000115579        | 0.001336713        |
| PLCB2         | 0.14419825         | 1.105116335        | 4.633572923        | 5.39E-06        | 6.94E-05        | 0.11826077         | 1.085425547        | 5.143517986        | 4.35E-07           | 1.36E-05           |
| <b>PLEK</b>   | <b>0.183221455</b> | <b>1.135416376</b> | <b>5.253313602</b> | <b>2.86E-07</b> | <b>5.31E-06</b> | <b>0.083788268</b> | <b>1.059797234</b> | <b>3.292007573</b> | <b>0.001089184</b> | <b>0.007848401</b> |
| PLEKHG2       | 0.162183288        | 1.118979254        | 4.789346908        | 2.65E-06        | 3.75E-05        | 0.088080544        | 1.062955016        | 3.909007539        | 0.00010997         | 0.001282742        |
| PMAIP1        | 0.156305945        | 1.114429957        | 4.084295661        | 5.70E-05        | 0.000529856     | 0.340874612        | 1.266524172        | 8.756108303        | 7.02E-17           | 1.25E-14           |
| PNRC1         | 0.111342396        | 1.080232902        | 4.014727395        | 7.55E-05        | 0.000675048     | 0.189766999        | 1.140579493        | 8.085652817        | 8.63E-15           | 1.28E-12           |
| POFUT2        | -0.081974139       | 0.944763976        | -4.229119756       | 3.13E-05        | 0.000320035     | -0.057976816       | 0.960610301        | -3.34313745        | 0.000911801        | 0.006834137        |
| POLR1C        | -0.074944427       | 0.94937869         | -3.623946854       | 0.000341401     | 0.002407333     | -0.094174239       | 0.936808299        | -5.554022368       | 5.30E-08           | 2.26E-06           |
| PPA2          | -0.07420225        | 0.949867213        | -3.287428391       | 0.001132891     | 0.006596835     | -0.082983799       | 0.944103021        | -5.08803853        | 5.73E-07           | 1.68E-05           |
| PPM1B         | 0.123715347        | 1.089537118        | 3.907006002        | 0.000115847     | 0.000964904     | 0.197387686        | 1.146620268        | 6.837722535        | 3.28E-11           | 3.33E-09           |
| PPP1R14A      | 0.101993702        | 1.073255601        | 4.513812499        | 9.20E-06        | 0.000109745     | 0.096762875        | 1.069371309        | 3.737777955        | 0.000214592        | 0.002160668        |
| PRDX4         | -0.122274476       | 0.918738075        | -5.354852024       | 1.72E-07        | 3.40E-06        | -0.063036505       | 0.957247236        | -3.935635899       | 9.89E-05           | 0.001178603        |
| PRKCA         | 0.168047696        | 1.123537047        | 4.118823258        | 4.95E-05        | 0.000471313     | 0.117445353        | 1.084812234        | 3.731002385        | 0.000220233        | 0.00219916         |
| PRPF38B       | 0.074819111        | 1.053228971        | 3.887352861        | 0.000125137     | 0.001029932     | 0.082492927        | 1.05884611         | 4.870438567        | 1.64E-06           | 4.10E-05           |
| PSCD4         | 0.16455209         | 1.120818046        | 6.458496931        | 4.33E-10        | 1.75E-08        | 0.085713665        | 1.061212567        | 3.780685422        | 0.000181912        | 0.001890489        |
| PSMG1         | -0.163159796       | 0.893066929        | -6.982837056       | 1.91E-11        | 1.15E-09        | -0.055318577       | 0.962381906        | -3.34189826        | 0.000915762        | 0.006855604        |
| <b>PTGER4</b> | <b>0.168539459</b> | <b>1.123920086</b> | <b>4.900698401</b> | <b>1.58E-06</b> | <b>2.38E-05</b> | <b>0.126426806</b> | <b>1.091586764</b> | <b>5.544644821</b> | <b>5.57E-08</b>    | <b>2.34E-06</b>    |
| PTGES2        | -0.079042844       | 0.946685517        | -3.526549762       | 0.000487758     | 0.003241867     | -0.129356795       | 0.91423896         | -7.036804222       | 9.41E-12           | 1.01E-09           |

|          |              |             |              |             |             |              |             |              |             |             |
|----------|--------------|-------------|--------------|-------------|-------------|--------------|-------------|--------------|-------------|-------------|
| PTGS2    | 0.141803996  | 1.103283838 | 3.516518304  | 0.00050579  | 0.003333361 | 0.885610294  | 1.847546011 | 18.06600062  | 6.22E-53    | 9.72E-50    |
| PTPN1    | 0.076072969  | 1.054144738 | 4.045351584  | 6.67E-05    | 0.000604506 | 0.05852511   | 1.041400576 | 3.959030897  | 9.00E-05    | 0.001088681 |
| RARA     | 0.204796892  | 1.152524078 | 5.642775463  | 3.91E-08    | 9.30E-07    | 0.080018282  | 1.057031435 | 4.019030828  | 7.06E-05    | 0.000892163 |
| RFX2     | 0.122455843  | 1.088586344 | 3.959551171  | 9.41E-05    | 0.000812012 | 0.225426628  | 1.169122926 | 6.070595993  | 3.12E-09    | 1.94E-07    |
| RGL2     | 0.130432094  | 1.094621497 | 5.221786219  | 3.34E-07    | 6.10E-06    | 0.122475235  | 1.088600976 | 5.925625387  | 7.05E-09    | 3.86E-07    |
| RGS2     | 0.229580862  | 1.172494261 | 4.696722507  | 4.05E-06    | 5.45E-05    | 0.168739653  | 1.124076056 | 8.334394873  | 1.49E-15    | 2.42E-13    |
| RNF113A  | -0.082422209 | 0.944470598 | -3.258936807 | 0.001248599 | 0.007095446 | -0.116217893 | 0.92260314  | -5.092753527 | 5.60E-07    | 1.66E-05    |
| RNF149   | 0.096919046  | 1.069487074 | 3.731752536  | 0.000227947 | 0.001717781 | 0.131518445  | 1.095446058 | 4.738500744  | 3.06E-06    | 6.76E-05    |
| RNF217   | 0.127029555  | 1.092042917 | 5.112944546  | 5.70E-07    | 9.74E-06    | 0.084240061  | 1.060129172 | 3.81238199   | 0.000160851 | 0.001718771 |
| RNPEP    | -0.177302645 | 0.884354898 | -4.931097549 | 1.37E-06    | 2.10E-05    | -0.11881042  | 0.920946708 | -3.65914325  | 0.000289311 | 0.002715439 |
| RNU2-1   | 0.089136211  | 1.0637331   | 3.154657464  | 0.001772137 | 0.009435798 | 0.232229619  | 1.174648913 | 4.8201538    | 2.09E-06    | 4.92E-05    |
| RPP21    | -0.094224611 | 0.93677559  | -4.38143606  | 1.64E-05    | 0.000183906 | -0.056630747 | 0.961506991 | -3.770796441 | 0.000188998 | 0.001951156 |
| RPUSD3   | -0.090199345 | 0.939392939 | -5.022377427 | 8.84E-07    | 1.45E-05    | -0.057699648 | 0.960794869 | -4.009102015 | 7.36E-05    | 0.000916105 |
| S100A6   | -0.099892632 | 0.933102432 | -5.116743895 | 5.60E-07    | 9.60E-06    | -0.053921892 | 0.963314047 | -3.269435636 | 0.001177266 | 0.008376881 |
| SARS2    | -0.106524186 | 0.928823136 | -4.087708421 | 5.62E-05    | 0.000523705 | -0.092005007 | 0.93821794  | -3.362818804 | 0.000850992 | 0.006467541 |
| SEC11C   | -0.119082005 | 0.920773358 | -4.287702423 | 2.45E-05    | 0.000257837 | -0.100547919 | 0.932678703 | -4.750360269 | 2.90E-06    | 6.43E-05    |
| SERPINB6 | -0.165039723 | 0.891903962 | -6.598549199 | 1.91E-10    | 8.45E-09    | -0.072064957 | 0.951275444 | -4.208462677 | 3.22E-05    | 0.000476011 |
| SERTAD1  | 0.084364397  | 1.060220541 | 3.98495583   | 8.51E-05    | 0.000743052 | 0.074447725  | 1.052957878 | 4.179484188  | 3.64E-05    | 0.000524785 |
| SH2B1    | 0.09856572   | 1.07070847  | 3.932551086  | 0.000104746 | 0.000889027 | 0.078067408  | 1.055603038 | 3.435970305  | 0.000656541 | 0.005225323 |
| SLC18A1  | 0.098355691  | 1.070552606 | 3.791154669  | 0.000181724 | 0.001418174 | 0.0990115    | 1.071039361 | 3.338810689  | 0.000925701 | 0.006905097 |
| SLC22A4  | 0.319186567  | 1.247626902 | 6.6158757    | 1.73E-10    | 7.74E-09    | 0.096331762  | 1.069051802 | 3.837675718  | 0.00014572  | 0.0015897   |
| SLC25A25 | 0.091011409  | 1.065116626 | 3.779264106  | 0.000190201 | 0.001469652 | 0.100590778  | 1.072212439 | 4.019269151  | 7.06E-05    | 0.000892163 |
| SLC25A37 | 0.192104326  | 1.142428857 | 4.991330908  | 1.03E-06    | 1.66E-05    | 0.171914461  | 1.126552432 | 4.10071437   | 5.05E-05    | 0.000685251 |
| SLC39A11 | -0.129511434 | 0.91414097  | -4.785507913 | 2.70E-06    | 3.80E-05    | -0.071631819 | 0.951561087 | -3.913258903 | 0.000108125 | 0.001264532 |
| SLC47A1  | -0.438124158 | 0.73809368  | -7.513785862 | 6.85E-13    | 5.79E-11    | -0.153173451 | 0.899270189 | -3.913505762 | 0.000108019 | 0.001264473 |
| SLC7A1   | -0.215612978 | 0.861180181 | -5.23197469  | 3.18E-07    | 5.86E-06    | -0.088604519 | 0.940431965 | -4.202197849 | 3.31E-05    | 0.000485327 |
| SMU1     | -0.091258964 | 0.938703235 | -3.685538694 | 0.000271358 | 0.00198809  | -0.093463147 | 0.937270157 | -3.996267862 | 7.75E-05    | 0.000954403 |



|              |                    |                    |                    |                    |                    |                    |                    |                    |                 |                 |
|--------------|--------------------|--------------------|--------------------|--------------------|--------------------|--------------------|--------------------|--------------------|-----------------|-----------------|
| SNF8         | -0.109213554       | 0.927093304        | -3.561845788       | 0.000428989        | 0.002913213        | -0.090036648       | 0.939498883        | -3.594467712       | 0.000368457     | 0.003316378     |
| SNTA1        | -0.101696995       | 0.93193614         | -4.957948309       | 1.20E-06           | 1.89E-05           | -0.079569109       | 0.946340249        | -4.281244365       | 2.36E-05        | 0.000371664     |
| SNTB1        | -0.211121373       | 0.863865508        | -6.269608528       | 1.28E-09           | 4.51E-08           | -0.07764309        | 0.947604471        | -3.247651786       | 0.001268498     | 0.008845789     |
| SON          | 0.075373826        | 1.053634015        | 3.141570888        | 0.001850561        | 0.009790825        | 0.254330085        | 1.192781747        | 11.63066244        | 6.57E-27        | 2.16E-24        |
| SORL1        | 0.217433749        | 1.162663612        | 4.243383738        | 2.95E-05           | 0.000302432        | 0.155869881        | 1.114093164        | 5.317985172        | 1.81E-07        | 6.53E-06        |
| <b>SP100</b> | <b>0.074333565</b> | <b>1.052874561</b> | <b>3.147790262</b> | <b>0.001812899</b> | <b>0.009628234</b> | <b>0.10708263</b>  | <b>1.077048062</b> | <b>4.86147341</b>  | <b>1.72E-06</b> | <b>4.23E-05</b> |
| SPATA2L      | 0.077883117        | 1.055468203        | 3.306623063        | 0.001060644        | 0.006248902        | 0.082802203        | 1.059073123        | 3.657107           | 0.000291538     | 0.00273019      |
| SRGN         | 0.120913519        | 1.087423204        | 3.566045338        | 0.000422457        | 0.002875101        | 0.091791169        | 1.065692465        | 5.033841392        | 7.48E-07        | 2.12E-05        |
| SSH1         | 0.117886582        | 1.08514406         | 3.275325526        | 0.001180769        | 0.006801375        | 0.092150307        | 1.065957787        | 3.528921079        | 0.000469091     | 0.004011335     |
| SSR4         | -0.154674864       | 0.898334805        | -7.311714215       | 2.48E-12           | 1.87E-10           | -0.081743484       | 0.944915035        | -5.285984039       | 2.13E-07        | 7.53E-06        |
| STRA13       | -0.102395792       | 0.931484849        | -4.550799609       | 7.81E-06           | 9.54E-05           | -0.068303416       | 0.953758943        | -4.469907997       | 1.04E-05        | 0.000186722     |
| STX8         | -0.106395069       | 0.928906267        | -4.97611805        | 1.10E-06           | 1.76E-05           | -0.088080028       | 0.94077392         | -4.768060974       | 2.67E-06        | 6.01E-05        |
| TCEB2        | -0.12807382        | 0.915052346        | -7.164054602       | 6.25E-12           | 4.24E-10           | -0.053410397       | 0.963655642        | -3.897313069       | 0.000115197     | 0.001335985     |
| TGFA         | 0.207188734        | 1.154436432        | 4.902585253        | 1.56E-06           | 2.36E-05           | 0.25810278         | 1.195904992        | 7.682987411        | 1.37E-13        | 1.77E-11        |
| THOC6        | -0.102747106       | 0.931258048        | -4.935452565       | 1.34E-06           | 2.07E-05           | -0.050463218       | 0.965626238        | -3.313130403       | 0.001012337     | 0.007396983     |
| TLE4         | 0.099582303        | 1.071463202        | 3.962745287        | 9.29E-05           | 0.000803427        | 0.095692412        | 1.068578142        | 6.151186144        | 1.97E-09        | 1.28E-07        |
| <b>TLR1</b>  | <b>0.212698796</b> | <b>1.158853983</b> | <b>5.920077987</b> | <b>8.90E-09</b>    | <b>2.54E-07</b>    | <b>0.144246725</b> | <b>1.105153468</b> | <b>5.979914611</b> | <b>5.21E-09</b> | <b>3.01E-07</b> |
| <b>TLR6</b>  | <b>0.118636299</b> | <b>1.085708117</b> | <b>5.635337649</b> | <b>4.07E-08</b>    | <b>9.62E-07</b>    | <b>0.191448304</b> | <b>1.141909489</b> | <b>9.762034106</b> | <b>3.30E-20</b> | <b>8.08E-18</b> |
| TMED3        | -0.156932298       | 0.89693025         | -6.041643793       | 4.57E-09           | 1.40E-07           | -0.077397534       | 0.947765773        | -3.694631609       | 0.00025298      | 0.002449853     |
| TMEM108      | -0.083008478       | 0.944086871        | -3.226132034       | 0.001395365        | 0.007784405        | -0.075176839       | 0.949225762        | -3.406084436       | 0.000730346     | 0.00570318      |
| TMEM119      | 0.407320849        | 1.326220673        | 4.852267483        | 1.98E-06           | 2.90E-05           | 0.090267444        | 1.064567511        | 3.323504339        | 0.000976469     | 0.007198008     |
| TMEM126B     | -0.09773921        | 0.934496257        | -4.190760703       | 3.67E-05           | 0.000366626        | -0.073910422       | 0.950059371        | -3.814685801       | 0.000159414     | 0.001709726     |
| TMEM185B     | 0.087540945        | 1.062557523        | 4.512213377        | 9.26E-06           | 0.000110417        | 0.109293468        | 1.078699835        | 5.545711283        | 5.54E-08        | 2.33E-06        |
| TMEM4        | -0.077282717       | 0.947841204        | -4.299799302       | 2.32E-05           | 0.000246188        | -0.048000547       | 0.967275963        | -3.318931382       | 0.000992132     | 0.007283404     |
| TMEM43       | 0.113626321        | 1.081944369        | 5.403639932        | 1.34E-07           | 2.74E-06           | 0.080609124        | 1.057464421        | 5.069355037        | 6.28E-07        | 1.80E-05        |
| TMEM86B      | 0.132776113        | 1.096401428        | 4.832430923        | 2.17E-06           | 3.16E-05           | 0.099500867        | 1.071402722        | 5.01787758         | 8.08E-07        | 2.25E-05        |
| TMEM88       | 0.113122368        | 1.081566497        | 3.774864035        | 0.000193432        | 0.001488176        | 0.210288183        | 1.156919259        | 7.519166485        | 4.11E-13        | 4.98E-11        |

|             |                     |                   |                     |                    |                    |                     |                    |                     |                 |                 |
|-------------|---------------------|-------------------|---------------------|--------------------|--------------------|---------------------|--------------------|---------------------|-----------------|-----------------|
| TMUB1       | 0.10526693          | 1.075693399       | 5.09535617          | 6.21E-07           | 1.06E-05           | 0.061799654         | 1.04376697         | 3.308876704         | 0.001027395     | 0.007485344     |
| TNFAIP3     | 0.278513353         | 1.212944343       | 8.39573452          | 1.94E-15           | 3.11E-13           | 0.131558543         | 1.095476505        | 4.412551789         | 1.34E-05        | 0.000231533     |
| TOMM40      | -0.156370358        | 0.897279678       | -4.358870061        | 1.81E-05           | 0.000199781        | -0.067701725        | 0.9541568          | -3.598877343        | 0.000362472     | 0.003281412     |
| TP53INP2    | 0.071232699         | 1.050613989       | 4.410001098         | 1.45E-05           | 0.000164771        | 0.087800336         | 1.062748583        | 4.915240647         | 1.33E-06        | 3.47E-05        |
| TRAPPC2L    | -0.102562753        | 0.931377055       | -3.813981748        | 0.000166441        | 0.001307883        | -0.099801477        | 0.933161391        | -5.347559655        | 1.55E-07        | 5.71E-06        |
| TRAPPC6A    | -0.139423253        | 0.907882027       | -4.798217477        | 2.54E-06           | 3.61E-05           | -0.0762047          | 0.948549719        | -3.248868851        | 0.001263233     | 0.008824934     |
| TRIB3       | -0.505640758        | 0.70434748        | -7.257304883        | 3.49E-12           | 2.46E-10           | -0.097255745        | 0.93480947         | -3.551400268        | 0.000431986     | 0.003732334     |
| TSPAN4      | -0.221314221        | 0.857783684       | -4.710113765        | 3.81E-06           | 5.18E-05           | -0.158522667        | 0.895942054        | -5.253527858        | 2.51E-07        | 8.60E-06        |
| TXNRD2      | -0.150498275        | 0.900939244       | -5.915606515        | 9.12E-09           | 2.58E-07           | -0.067631696        | 0.954203117        | -3.461327303        | 0.000599442     | 0.004875878     |
| UBE2D4      | -0.146220347        | 0.903614705       | -6.845449803        | 4.40E-11           | 2.41E-09           | -0.066175723        | 0.955166588        | -3.609610983        | 0.000348285     | 0.003173654     |
| UBP1        | 0.091088361         | 1.06517344        | 4.827129867         | 2.22E-06           | 3.22E-05           | 0.081511559         | 1.058126093        | 4.307660668         | 2.11E-05        | 0.000339171     |
| UQCRC2      | -0.123570753        | 0.91791295        | -4.830210277        | 2.19E-06           | 3.18E-05           | -0.060680077        | 0.958812035        | -3.387712162        | 0.000779485     | 0.00601551      |
| UROD        | -0.131555255        | 0.912846852       | -5.453197036        | 1.04E-07           | 2.19E-06           | -0.061655979        | 0.958163672        | -3.676231608        | 0.000271244     | 0.002572909     |
| <b>VARS</b> | <b>-0.085127761</b> | <b>0.94270105</b> | <b>-3.400475399</b> | <b>0.000765115</b> | <b>0.004728356</b> | <b>-0.084732456</b> | <b>0.942959389</b> | <b>-4.659160596</b> | <b>4.42E-06</b> | <b>9.25E-05</b> |
| VNN3        | 0.161419074         | 1.118386673       | 3.457440708         | 0.000625299        | 0.003982418        | 0.2947784           | 1.226696541        | 6.390723            | 4.90E-10        | 3.74E-08        |
| WASPIP      | 0.104509289         | 1.075128639       | 4.490045346         | 1.02E-05           | 0.00012036         | 0.091601082         | 1.065552061        | 4.799488687         | 2.30E-06        | 5.35E-05        |
| WBP11       | 0.090806583         | 1.064965417       | 4.702803815         | 3.94E-06           | 5.33E-05           | 0.084585568         | 1.06038309         | 4.75980026          | 2.77E-06        | 6.20E-05        |
| YARS        | -0.157195994        | 0.896766323       | -7.66595984         | 2.56E-13           | 2.36E-11           | -0.040546757        | 0.972286397        | -3.569282261        | 0.000404453     | 0.003533526     |
| YIF1A       | -0.107681134        | 0.928078579       | -3.821679167        | 0.000161567        | 0.001276809        | -0.079763628        | 0.946212662        | -3.640561673        | 0.000310238     | 0.002884527     |
| YPEL5       | 0.075428218         | 1.053673739       | 3.846044248         | 0.000147015        | 0.001178947        | 0.103422692         | 1.074319188        | 6.630585064         | 1.17E-10        | 1.01E-08        |
| ZBTB24      | -0.084531568        | 0.9430907         | -4.770365716        | 2.89E-06           | 4.05E-05           | -0.097970295        | 0.934346585        | -6.759323447        | 5.32E-11        | 5.12E-09        |
| ZBTB3       | -0.104260947        | 0.930281378       | -4.153533406        | 4.29E-05           | 0.000420087        | -0.116240583        | 0.922588629        | -5.281923335        | 2.17E-07        | 7.67E-06        |
| ZEB2        | 0.10072671          | 1.072313469       | 3.421123906         | 0.000711368        | 0.004464619        | 0.15967798          | 1.11703778         | 6.970708709         | 1.43E-11        | 1.51E-09        |
| ZMYND15     | 0.253099048         | 1.191764392       | 6.232534497         | 1.58E-09           | 5.49E-08           | 0.131169235         | 1.095180933        | 3.740695801         | 0.000212204     | 0.002149535     |
| ZSWIM4      | 0.45012701          | 1.366160524       | 7.895154562         | 5.70E-14           | 5.99E-12           | 0.50124646          | 1.415435943        | 15.78706282         | 2.07E-43        | 1.52E-40        |

<sup>A</sup> Please see Methods for cut-off values for definition of differential expression. The differentially expressed MDM gene list contained 2171 genes compared to 1842 in the monocytes. Only those that display concordant differential expression in *TRIB1*<sup>High</sup> versus *TRIB1*<sup>Low</sup> cells are shown. <sup>B</sup> Grey highlighting indicates those Genes assigned by DAVID to the GO 0006954 'Inflammatory Response' cluster. There was a 2.84-fold over-representation of these genes in this 'Cluster of Terms but P values (P= 6.96 x 10<sup>-5</sup>, Benjamini-Hochberg adjusted P value 1.058 X 10<sup>-1</sup>) were modest.

**Table S2. Top-ranking biological processes enriched in differentially expressed gene lists of (1) Human *TRIB1*<sup>High</sup> versus *TRIB1*<sup>Low</sup> monocytes and (2) between *TRIB1*<sup>High</sup> versus *TRIB1*<sup>Low</sup> MDMs.**

| Monocytes                                   |                |                                                                                                                                                                                                                             |                                                                     |                                                   | Monocyte Derived Macrophages |                                                                                       |                                                                |                                                  |
|---------------------------------------------|----------------|-----------------------------------------------------------------------------------------------------------------------------------------------------------------------------------------------------------------------------|---------------------------------------------------------------------|---------------------------------------------------|------------------------------|---------------------------------------------------------------------------------------|----------------------------------------------------------------|--------------------------------------------------|
| Cluster description <sup>A</sup>            | Rank           | Cluster Gene Ontology terms in differentially expressed gene-sets (DEG <sup>B</sup> )                                                                                                                                       | Cluster enrichment in DEG of <i>TRIB1</i> <sup>High</sup> monocytes | p value <sup>C</sup> ranges                       | Rank                         | Cluster Gene Ontology terms in differentially expressed gene-sets (DEG <sup>B</sup> ) | Cluster enrichment in DEG of <i>TRIB1</i> <sup>High</sup> MDMs | p value <sup>C</sup> ranges                      |
| Ribonucleoprotein Complex                   | 1 <sup>D</sup> | 0022613; 0042254; 0034660; 0016072; 0006364; 0034470                                                                                                                                                                        | 8.78                                                                | 3.9 x 10 <sup>-9</sup> - 2.6 x 10 <sup>-5</sup>   | -                            | -                                                                                     | -                                                              | -                                                |
| Oxoacid, Carboxylic & Fatty acid metabolism | -              |                                                                                                                                                                                                                             |                                                                     |                                                   | 1                            | 0043436; 0019752; 0006631                                                             | 8.28                                                           | 7.9 x 10 <sup>-8</sup> - 3.3 x 10 <sup>-3</sup>  |
| Apoptosis & Cell Death                      | 2              | 0006915 <sup>E</sup> ; 0012501; 0016265; 0008219                                                                                                                                                                            | 6.87                                                                | 6.8 x 10 <sup>-6</sup> - 1.6 x 10 <sup>-4</sup>   | -                            |                                                                                       | -                                                              | -                                                |
| Signal transduction & Cell communication    | -              |                                                                                                                                                                                                                             | -                                                                   | -                                                 | 2                            | 0009966; 0010648; 0009968; 1902532                                                    | 7.62                                                           | 1.1 x 10 <sup>-10</sup> - 3.4 x 10 <sup>-4</sup> |
| Regulation of Cell Death & Apoptosis        | 3              | 00043067 <sup>E</sup> ; 0042981 <sup>E</sup> ; 0043069 <sup>E</sup> ; 0060548 <sup>E</sup> ; 0043066 <sup>E</sup> ; 0043068 <sup>E</sup> ; 0010942 <sup>E</sup> ; 0043065 <sup>E</sup> ; 0010941; 0006916; 0006917; 0012502 | 6.03                                                                | 6.5 x 10 <sup>-7</sup> - 5.2 x 10 <sup>-3</sup>   | 4                            | 0043067; 0042981; 0043069; 0006915; 0060548; 0043066; 0043068; 0010942; 0043065;      | 6.81                                                           | 8.4 x 10 <sup>-8</sup> - 1.48 x 10 <sup>-3</sup> |
| Response to unfolded proteins               | 13             | 0006986 <sup>F</sup>                                                                                                                                                                                                        | 2.53                                                                | 8 x 10 <sup>-3</sup>                              | 3                            | 0006986; 0034620; 0030968; 0036498; 0035967                                           | 6.91                                                           | 9.0 x 10 <sup>-8</sup> - 1.48 x 10 <sup>-4</sup> |
| Macromolecular Complex Subunit Organisation | 4              | 0034621; 0034622; 0043933; 0065003; 0070271                                                                                                                                                                                 | 5.72                                                                | 7.33 x 10 <sup>-6</sup> - 4.82 x 10 <sup>-2</sup> | -                            | -                                                                                     | -                                                              | -                                                |

<sup>A</sup> Annotation was performed using the Database for Annotation, Visualization and Integrated Discovery (DAVID) Platform.

<sup>B</sup> DEG lists, defined as in the Methods Section, comprised 1842 (monocytes) and 2171 (MDM) genes.

<sup>C</sup> The monocyte and MDM DEG lists returned respectively 13 and 27 GO clusters with Benjamini-Hochberg adjusted P values > 5.0 x 10<sup>-2</sup>

<sup>D</sup> Benjamini-Hochberg adjusted P values

<sup>E</sup> GO term also present in MDM Cluster 4 of GO terms

<sup>F</sup> GO term also present in MDM Cluster 3 of GO terms

**Table S3. The most significantly altered pathways in *TRIB1*<sup>High</sup> versus *TRIB1*<sup>Low</sup> macrophages.**

| Monocyte Derived Macrophages |                                                         |         |                  |                        |                        | Monocytes              |                        |                        |
|------------------------------|---------------------------------------------------------|---------|------------------|------------------------|------------------------|------------------------|------------------------|------------------------|
| Pathway No.                  | Pathway Name                                            | Ranking | Log. fold change | p value                | FDR                    | Log. fold change       | p value                | FDR                    |
| 645                          | Creation of C4 and C2 Activators                        | 1       | 0.34             | 1.6 x 10 <sup>-5</sup> | 7.3 x 10 <sup>-5</sup> | Not present            |                        |                        |
| 199                          | Translocation of Zap 70 to Immunological Synapse        | 2       | 0.20             | < 10 <sup>-7</sup>     | < 10 <sup>-7</sup>     | -0.03                  | 0.45                   | 0.54                   |
| 380                          | PD1 Signaling                                           | 3       | 0.17             | < 10 <sup>-7</sup>     | < 10 <sup>-7</sup>     | -0.02                  | 0.60                   | 0.67                   |
| 197                          | Phosphorylation Of CD3 And TCR Zeta Chains              | 4       | 0.16             | < 10 <sup>-7</sup>     | < 10 <sup>-7</sup>     | -0.03                  | 0.46                   | 0.54                   |
| 222                          | <b>HDL Mediated Lipid Transport</b>                     | 5       | 0.16             | < 10 <sup>-7</sup>     | < 10 <sup>-7</sup>     | 0.01                   | 0.36                   | 0.43                   |
| 263                          | <b>Chemokine Receptors Bind Chemokines</b>              | 6       | 0.15             | < 10 <sup>-7</sup>     | < 10 <sup>-7</sup>     | 0.23                   | < 10 <sup>-7</sup>     | < 10 <sup>-7</sup>     |
| 647                          | Initial Triggering of Complement                        | 7       | 0.15             | 5.1 x 10 <sup>-4</sup> | 1.7 x 10 <sup>-3</sup> | 0.01                   | 0.74                   | 0.79                   |
| 202                          | Generation of Second Messenger Molecules                | 8       | 0.13             | < 10 <sup>-7</sup>     | < 10 <sup>-7</sup>     | -0.01                  | 0.59                   | 0.67                   |
| 604                          | <b>Lipoprotein Metabolism</b>                           | 9       | 0.11             | < 10 <sup>-7</sup>     | < 10 <sup>-7</sup>     | Not present            |                        |                        |
| 270                          | Norepinephrine Neurotransmitter Release Cycle           | 10      | 0.10             | 1.9 x 10 <sup>-6</sup> | 9.5 x 10 <sup>-6</sup> | 0.04                   | 1 x 10 <sup>-3</sup>   | 2 x 10 <sup>-3</sup>   |
| 280                          | Steroid Hormones                                        | 11      | 0.09             | < 10 <sup>-7</sup>     | < 10 <sup>-7</sup>     | -0.01                  | 0.45                   | 0.54                   |
| 24                           | Metabolism of Steroid Hormones and Vitamins A and D     | 12      | 0.09             | < 10 <sup>-7</sup>     | < 10 <sup>-7</sup>     | -0.01                  | 0.22                   | 0.29                   |
| 246                          | <b>Peptide Ligand Binding Receptors</b>                 | 13      | 0.09             | < 10 <sup>-7</sup>     | < 10 <sup>-7</sup>     | 0.11                   | < 10 <sup>-7</sup>     | < 10 <sup>-7</sup>     |
| 405                          | Zinc Transporters                                       | 14      | 0.08             | 2.3 x 10 <sup>-6</sup> | 1.1 x 10 <sup>-5</sup> | -0.02                  | 0.03                   | 0.05                   |
| 607                          | <b>Chylomicron Mediated Lipid Transport</b>             | 15      | 0.08             | 6.2 x 10 <sup>-4</sup> | 2.0 x 10 <sup>-3</sup> | -4.35x10 <sup>-3</sup> | 0.61                   | 0.68                   |
| 244                          | <b>Mitochondrial fatty acid Beta oxidation</b>          | 10      | -0.07            | 1.8 x 10 <sup>-7</sup> | 1.0 x 10 <sup>-6</sup> | -0.04                  | 1.2 x 10 <sup>-6</sup> | 5.4 x 10 <sup>-6</sup> |
| 278                          | <b>tRNA aminoacylation</b>                              | 9       | -0.07            | < 10 <sup>-7</sup>     | < 10 <sup>-7</sup>     | -0.04                  | < 10 <sup>-7</sup>     | < 10 <sup>-7</sup>     |
| 85                           | Glycosphingolipid Metabolism                            | 8       | -0.07            | < 10 <sup>-7</sup>     | < 10 <sup>-7</sup>     | -0.01                  | 0.17                   | 0.23                   |
| 313                          | CDC6 association with the ORC origin complex            | 7       | -0.08            | 3.3 x 10 <sup>-4</sup> | 1.0 x 10 <sup>-3</sup> | 0.02                   | 0.27                   | 0.34                   |
| 221                          | Apoptotic cleavage of cell adhesion proteins            | 6       | -0.08            | 6.0 x 10 <sup>-6</sup> | 2.8 x 10 <sup>-5</sup> | 0.01                   | 0.40                   | 0.49                   |
| 257                          | <b>Cytosolic tRNA Aminoacylation</b>                    | 5       | -0.09            | < 10 <sup>-7</sup>     | < 10 <sup>-7</sup>     | -0.03                  | < 10 <sup>-7</sup>     | 1.9 x 10 <sup>-7</sup> |
| 661                          | <b>Metabolism of Porphyrins</b>                         | 4       | -0.10            | < 10 <sup>-7</sup>     | < 10 <sup>-7</sup>     | -0.04                  | 6.7 x 10 <sup>-5</sup> | 2.1 x 10 <sup>-4</sup> |
| 300                          | Hormone ligand binding receptors                        | 3       | -0.10            | 1.5 x 10 <sup>-6</sup> | 7.8 x 10 <sup>-6</sup> | -0.01                  | 0.33                   | 0.41                   |
| 558                          | Ethanol oxidation                                       | 2       | -0.13            | < 10 <sup>-7</sup>     | < 10 <sup>-7</sup>     | -0.01                  | 0.46                   | 0.55                   |
| 485                          | Amino acid synthesis and interconversion transamination | 1       | -0.17            | < 10 <sup>-7</sup>     | < 10 <sup>-7</sup>     | -0.02                  | 0.07                   | 0.11                   |

Results of Quantitative Set Analysis of Gene Expression (Qusage version 2.2.2) analysis comparing gene expression values of genes assigned to the specified Reactome Pathways in *TRIB1*<sup>High</sup> versus *TRIB1*<sup>Low</sup> samples in CTS dataset. Ranking of Reactome pathways (version 4.0) according to MDM transcriptome. Increased (above dotted line) and reduced average RNA levels of gene set assigned to specified REACTOME Pathway. Pathways highlighted in **Green** are significantly altered in both cell types; lipid-metabolism associated pathways (only altered in macrophages are highlighted in **Red**). **357** (MDM) and **332** (monocytes) ranked pathways were returned with P values < 0.05.

**Table S4. Linoleic (LiA), oleic (OA), and lauric acid (LA) in vitro polarized human MDMs recapitulate the *Olr1*<sup>High</sup>/*Lpl*<sup>High</sup>/*Scarb1*<sup>Low</sup>/*CD36*<sup>WT</sup> RNA profile of *Trib1*<sup>mTg</sup> BMDM.**

| Stimulus        | <i>OLR1</i> |                 | <i>LPL</i>  |                 | <i>SCARB1</i> |                 |
|-----------------|-------------|-----------------|-------------|-----------------|---------------|-----------------|
|                 | Fold Change | p               | Fold Change | p               | Fold Change   | p               |
| <b>LiA</b>      | <b>6.36</b> | <b>6.60E-09</b> | <b>2.86</b> | <b>2.65E-05</b> | <b>-1.99</b>  | <b>7.68E-07</b> |
| SA              | 6.17        | 1.08E-08        | 3.19        | 4.00E-06        | -1.85         | 8.55E-06        |
| <b>OA</b>       | <b>5.50</b> | <b>5.70E-12</b> | <b>2.65</b> | <b>3.87E-07</b> | <b>-1.38</b>  | <b>1.66E-03</b> |
| <b>LA</b>       | <b>5.20</b> | <b>1.73E-07</b> | <b>4.44</b> | <b>6,37E-09</b> | <b>-1.33</b>  | <b>3.32E-02</b> |
| PA              | 4.76        | 1.78E-10        | 5.62        | 7.26E-17        | -1.75         | 1.31E-07        |
| <i>TNF_PGE2</i> | 4.42        | 3.88E-04        | -2.10       | 2.58E-02        | -1.52         | 2.33E-02        |
| TNF_P3C         | 3.86        | 1.21E-03        | -1.38       | 3.30E-01        | -1.24         | 2.34E-01        |
| upLPS           | 3.42        | 3.40E-06        | 1.82        | 4.15E-03        | -1.12         | 3.14E-01        |
| <i>TPP</i>      | 2.66        | 9.76E-05        | -2.80       | 5.33E-07        | -1.38         | 3.53E-03        |
| <i>TPP_IFNb</i> | 2.37        | 3.68E-02        | -3.28       | 4.31E-04        | -1.62         | 8.93E-03        |
| <i>TNF</i>      | 2.30        | 6.50E-03        | 1.86        | 1.12E-02        | -1.68         | 1.61E-04        |
| <i>sLPS</i>     | 1.86        | 2.10E-02        | -1.36       | 1.60E-01        | -1.27         | 4.43E-02        |
| sLPS_IFNg       | 1.80        | 1.54E-01        | -2.00       | 3.71E-02        | -1.62         | 8.86E-03        |
| IFNg            | 1.73        | 5.39E-02        | 1.33        | 2.10E-01        | -1.51         | 1.17E-03        |
| IFNg_TNF        | 1.49        | 3.30E-01        | 2.14        | 2.20E-02        | -1.92         | 4.33E-04        |
| sLPS_IC         | 1.46        | 3.57E-01        | -1.49       | 2.27E-01        | -1.38         | 8.14E-02        |
| HDL             | 1.33        | 4.31E-01        | -1.17       | 5.81E-01        | -1.02         | 8.94E-01        |
| IFNb            | 1.25        | 5.91E-01        | 1.45        | 2.58E-01        | -1.07         | 7.25E-01        |
| TPP_IFNb_IFNg   | -1.01       | 9.81E-01        | -3.52       | 1.95E-04        | -1.91         | 4.74E-04        |
| IL10            | -1.04       | 9.31E-01        | 2.74        | 2.59E-03        | 1.09          | 6.24E-01        |
| P3C_PGE2        | -1.18       | 6.90E-01        | -1.84       | 6.58E-02        | -1.33         | 1.14E-01        |
| P3C             | -1.33       | 4.93E-01        | -1.03       | 9.23E-01        | 1.00          | 9.91E-01        |
| PGE2            | -1.37       | 4.46E-01        | -1.59       | 1.63E-01        | 1.08          | 6.75E-01        |
| upLPS_IC        | -1.44       | 3.76E-01        | 1.03        | 9.24E-01        | 1.23          | 2.53E-01        |
| IL13            | -1.97       | 9.89E-02        | 3.52        | 1.92E-04        | -1.37         | 8.55E-02        |
| GC              | -2.28       | 4.59E-02        | -3.33       | 3.62E-04        | 1.38          | 8.13E-02        |
| IL4_upLPS       | -2.37       | 4.74E-03        | 1.61        | 5.12E-02        | 1.36          | 2.14E-02        |
| IL4             | -3.04       | 1.49E-06        | 2.05        | 9.04E-05        | 1.03          | 7.69E-01        |
| TRIB1 high MDM  | 1.86        | 4.76E-16        | 1.43        | 6.32E-11        | -1.18         | 2.00E-08        |

<sup>A</sup>Data extracted from Xue *et al.*

*Italics indicate the eleven conditions that produce reciprocal changes in OLR1 and SCARB1 RNA.*

**Bold indicates the three conditions that recapitulate the *Olr1*<sup>High</sup>/*Scarb1*<sup>Low</sup>/*Lpl*<sup>High</sup> profile of *Trib1*<sup>mTg</sup> BMDMs.**

**Table S5. Primer sequences.**

| Gene                | Forward primer (5'→3')                | Reverse primer (5'→3')                                                              |
|---------------------|---------------------------------------|-------------------------------------------------------------------------------------|
| <i>Abca1</i>        | GGCCAGTCTGTGTAACGGAT                  | TGCATCGAGCTTCTTCCTCG                                                                |
| <i>Abcg1</i>        | AGGTCTCAGCCTTCTAAAGTTCCTC             | TCTCTCGAAGTGAATGAAATTTATCG                                                          |
| <i>Abdh5</i>        | GTGTCCCCTGCACTTACAAGA                 | GGAGGACAAGTGGCGTCTTA                                                                |
| <i>Acat1</i>        | ATTTGCTGACGCTGCTGTAGA                 | AAGGCTTCATTTACTTCCCACATTG                                                           |
| <i>β-actin</i>      | GGGACCTGACAGACTACCTCATG               | GTCACGCACGATTTCCCTCTCAGC                                                            |
| <i>Cd163</i>        | CAGCGTAGTCTGCTCACGAT                  | AGTTGCTCCTGGCTGGTATG                                                                |
| <i>Cd68</i>         | AAGGGGGCTCTTGGAACATA                  | CGAAGGGATCGTCATAGCCC                                                                |
| <i>Cd36</i>         | ATGGGCTGTGATCGGAAGTGT                 | GTCTTCCCAATAAGCATGTCTCC                                                             |
| <i>Ces1</i>         | AGGGAGTTCTCGACGCAATG                  | ATGTAGGTGGGAGCTCCAGT                                                                |
| <i>Cxcl16</i>       | GAGCGCAAAGAGTGTGGAAGT                 | TGTGGACAAGGACCTGAAAAGT                                                              |
| <i>Hadhb</i>        | ACCTGCGTTCATCAAACCCT                  | CAGAAGCGCCATCAGTCAGG                                                                |
| <i>Lpl</i>          | TTGCAGAGAGAGGACTCGGA                  | GTTGCACCTGTATGCCTTGC                                                                |
| <i>Lxra</i>         | TCAGCATCTTCTCTGCAGACCGG               | TCATTAGCATCCGTGGGAACA                                                               |
| <i>Marco</i>        | GACAAGCCCTTCTTCTCGCT                  | CCAAGCCCTCTTTAAGCCCC                                                                |
| <i>Msr1</i>         | CGCACGTGGAACAGGAAGTA                  | TCTGTGAGTGTCCAGTCC                                                                  |
| <i>Nceh1</i>        | AGAAGACCCTGCCACAATGA                  | CTGTGACTACGGGACACGATT                                                               |
| <i>Olr1</i>         | AGATAGACACCCTCACCTTGAA                | GTCACGCACGATTTCCCTCTCAGC                                                            |
| <i>Pltp</i>         | CCATGTTGCCCCGAAGTGGAG                 | CCCCGGAGTGTCAACTTAGC                                                                |
| <i>Pparγ</i>        | GCCCTGGCAAAGCATTTGTA                  | TTTCTGTCAAGATCGCCCT                                                                 |
| <i>Ptgs1</i>        | GTTCCGAGCCCAGTTCCAATA                 | AGCTGTACTCTTGTGAGCCC                                                                |
| <i>Scarb1</i>       | GATGGAGAGCAAGCCTGTGA                  | GACTATGTGCAGGGGTGCTC                                                                |
| <i>Stab1</i>        | ACGCTGACTGCCTCAATACC                  | AAGCATCAGTGTGGCAAGT                                                                 |
| <i>Lyz2Cre</i>      | Common:<br>CTTGGGCTGCCAGAATTTCTC      | Mutant:<br>CCCAGAAATGCCAGATTACG<br><br>Wild type:<br>TTACAGTCGGCCAGGCTGAC           |
| <i>Rosa26.Trib1</i> | Common:<br>GTGATCTGCAACTCCAGTCTTTCTAG | Mutant:<br>CCTTCTTGACGAGTTCTTCTGAGG<br><br>Wild type:<br>CGCGACACTGTAATTTCATACTGTAG |
| <i>Trib1 fl/fl</i>  | Common:<br>ACCTTGATCTGCAGTCCTAGG      | Floxed:<br>AAGTTCACATTTGAACTGATGGC<br><br>Wild type:<br>AGCTGGTTTCAGGGGAAGAC        |
